# Supplementary material for: Structural insight into the function of human peptidyl arginine deiminase 6
Source: PubMed Central journal article supplement (PMC11402830; doi:10.1016/j.csbj.2024.08.019), 2024-08-16
Supplement: mmc2.pdf [file mmc2.pdf]

>ENSCGRG00001005116/1-684

-----MSFQSTVNLSLSDSPHAIACVLGTEITLDISGCAPKNCESFTIRGSPRVLIIHISS--VITGKAD  
AVVWQPMQTQTEALVRMVSPSPDVEDKVLISFYSPDKEVPTATAVLYLTGIEISLEADYRDGQLDMPSDK  
QAKKRWWWGPNWGWGAILLVNCPAETEDL-DD-QSSDQEAPKDIQNLSQMTLTVGPTSVFKNYMLILHTSK  
EEASKARVYLSQKGTCTYELVIGPGKPVHVLAP----FENRGKETFYIEAIEFPSASFAGLISFSISLVEK  
SHDKSIPEMPLYKDTVMFRVAPYIFTSTQMPLEVYLCREMQLQGFVDTVTRLSEKISVQVASVYEDPSRQG  
RWLQDEMAFCYTQAPHKTVSLILDTPRVSKLEDFPMKYSLSPGVGYLTYKTEDHGVASLDSIGNMIVSPPVK  
AQQGDYPLGRVLIGGSFYPSSEGRDMSKALRDFVCAQQVQAPVELFSDWLMTGHVDEFMCFVVKDKNNDGK  
GFRLLMASPSACYELFEQKQKEGFGDVTLFEDVRAEQLLSNGREARTISQILADQNLKQNDYVEKICISLNR  
TLLKKEGLMEKDIIAIPQLFCELELLTNVPSNQQTTLKFARPYFPDMLQMIVLDKNLGIKPFPGQIKGTCC  
LEEKVCNLEPLGLKCTFIDDFDCYLTNMGDSCACVHHRVPPFAFKWWWKMVP----  
>ENSM AUG00000018048/1-642

-----SFAIRGSPRVLIIHTSNS--VITGKTD  
TVVWQPMQTQMDALVRMVSPSPVDEDKVLVSYCPENEVPKTAVLYLTGIEISLEADYRDGQLDMPSDK  
QAKKKWWWGPNWGWGAILLVNCPV-TDEA-DD-EASDQEAPKEIQNMSQMTLTVDGPISVIKNYMMILHTSK  
EEANKAKVYWPQKG---THEM VIGPGKPIHVLAP----FENGGKETFYIEAIEFPSASFGLISFSISLVEE  
SHDKLVPEMPLYKDTVMFRVAPYIFTSTQPPLEVYLCRDLQLQGFVDTVTRLSEKINVQVASVYEDPSRQG  
RWLQDEMAFCYTQAPHKTVSLILDTPRVSKLEDFPMKYSLSPGVGYLTFETEDHGVASLDSIGNLIVSPPVK  
AQQGDYPLGRVLIGGSFYPSNEGRDMSKALRDFVCAQQVQAPVELFSDWLMTGRMDEFMCFVVKDKNNDGK  
GFRLLMASPSACYELFEQKQKEGFGDVTLFEDVRAEQLLSNGREARTISQILADQNLKQNDYVEKICISLNR  
TLLKKEGLTEKDIIAIPQLFCELELLTNVPSNQQTTHYARPYFPNMLQMLVLDKXVHGIPKPFPGQIKGTCC  
LEEKVCDVLEPLGLKCTFIDDFDCYLTNMGDTCACAVHHRVPPFAFKWWWKMIP----  
>ENSP EMG00000017319/1-692

EGQSSNLAMSFQSTLSLSDSPHAIACVLGMEITLDISGCAPENCQSFTIRGSPRILIIHISST--VITGKED  
AVVWRPMNKPTALVRMVSPSPVDEDKVLVSYCPDTEVPTATAVLYLTGVEVSLEADYRDGQLDMPSDK  
QAKKRWWWGPNWGWGAILLVNCPGERGES-EK-TRVWEPLYSEQENLSPMTLTVGEPQAVLKNYCLILHTSK  
EEASKAKVYLLQKGTSTYELVIGPGKPDHVLAP----FENRGKETFYIEAIEFPSANFTGLISFSVSLVEK  
SYDQLIPEVPLYKDTVMFRVAPYIFTSTQMPLELYLCRALQLQGFVDTVIRLSEKSNVQVASVYEDPNRQG  
KWLQDEMAFCYTQAPHKTVSLIFDTPRVSNMEEFPIKYSLSPGVGYLTHHTEHDHGVASLDSIGNLIVSPPVK  
AQQGDYPLGRVLIGGSFYPSSEGRDMSKALRDFVYAQQVQAPVELFSDWLMTGHMDEFMCFVVPNDKYDEGK  
GFRLLLASPSACYELFEQKQKEGYGDANLDFEVRPDQLISNGRESRTISQVLADENLRKQNDYVEKICISLNR  
TLLKKEGLTDKDIIPQLFCELEMLTNIPSGQNFTKHFARPYFPDMVRMIVLGRNLGIPKPFGLIKGTCC  
LEEKVCNLEPLGLKCTFIDDFCYLTNMGDTCACAVHHRVPPFAFKWWWKMIP----  
>ENSM SIG00000013004/1-682

-----MSFQNSLSLSLVNPHALCMVGMEITLDISKAPDKCKSFTIRGSPRILIIHISS--VIAGKED  
TVVWRSMNHPTVALVRMVAPSPTVDEDKVLVSYFCPDQEVPTATAVFLTGIEISLEADYRDGQLDMPSDK  
QAKKKWMMWGMNGWGAILLVNCPNAVGGP-DE-QS-FQEGPREIQNLSQMNVTVGPTSILQNYQLILHTSE  
EEAKKTRVYWSQRG-SSVYELVVGPNKPVYLLPT----FENRRKETFYVEATEFPSPSFGSLISLSLVEK  
AHDECIPEIPLYKDTVMFRVAPYIFMPSTQMPLEVYLCRELQLQGFVDSVTKLSEKSKVQVVKVYEDPNRQS  
KWLQDEMAFCYTQAPHKTVSLILDTPRVSKLEDFPMKYTLIPGFGYLIRQTEDHRVASLDSIGNLMVSPPVK  
AQQGDYPLGRVLIGGSFYPSSEGRDMNKGLREFVYAQQVQAPVELFSDWLMTGHVDQFMCFVPTNDKNNDQK  
DFRLLLASPSACFELFEQKQKEGYGNVTLFEDIGAEQLLSNGRESKTISQILADKSFREQNAYVEKICISLNR  
TLLKTELGLDCKDIILIPQLFCELEQLTNVPSNQQTSTKLFAFPYFPDMLQIIVLGNLGIKPFPGKIKGTCC  
LEEKVCGLLEPLGLKCTFIDDFCYLANIGDVCASAIINRVPPFAFKWWWKMTP----  
>ENSM USG00000040935/1-682

-----MSFQNSLSLSLVNPHALCMVGMEITLDISKAPDKCKSFTIRGSPRILIIHISS--VIAGKED  
TVVWRSMNHPTVALVRMVAPSPTVDEDKVLVSYFCPDQEVPTATAVFLTGIEISLEADYRDGQLDMPSDK  
QAKKKWMMWGMNGWGAILLVNCPNAVGGP-DE-QS-FQEGPREIQNLSQMNVTVGPTSILQNYQLILHTSE  
EEAKKTRVYWSQRG-SSAYELVVGPNKPVYLLPT----FENRRKETFYVEATEFPSPSFGSLISLSLVEK  
AHDECIPEIPLYKDTVMFRVAPYIFMPSTQMPLEVYLCRELQLQGFVDSVTKLSEKSKVQVVKVYEDPNRQS  
KWLQDEMAFCYTQAPHKTVSLILDTPRVSKLEDFPMKYTLIPGFGYLIRQTEDHRVASLDSIGNLMVSPPVK  
AQQGDYPLGRVLIGGSFYPSSEGRDMNKGLREFVYAQQVQAPVELFSDWLMTGHMDQFMCFVPTNDKNNDQK  
DFRLLLASPSACFELFEQKQKEGYGNVTLFEDIGAEQLLSNGRESKTISQILADKSFREQNTYVEKICISLNR  
TLLKTELGLDCKDIILIPQLFCELEQLTNVPSNQQTSTKLFAFPYFPDMLQIIVLGNLGIKPFPGKIKGTCC  
LEEKVCGLLEPLGLKCTFIDDFCYLANIGDVCASAIINRVPPFAFKWWWKMTP----  
>MGP\_SPRETEij\_G0027703/1-682

-----MSFQNSLSLSLVNPHALCMVGMEITLDISKAPDKCKSFTIRGSPRILIIHISS--VIAGKED  
TVVWRSMNHPTVALVRMVAPSPTVDEDKVLVSYFCPDQEVPTATAVFLTGIEVSLEADYRDGQLDMPSDK  
QAKKKWMMWGMNGWGAILLVNCPNAVGGP-DE-QS-FQEGPREIQDLSPMVTVGPTSILQNYQLILHTSE  
EEAKKTRVYWSQRG-SSAYELVVGPNKPVYLLPT----FENRRKETFYVEATEFPSPSFGSLISLSLVEK  
AHDECIPEIPLYKDTVMFRVAPYIFMPSTQMPLEVYLCRELQLQGFVDSVTKLSKSKVQVVKVYEDPNRQS  
KWLQDEMAFCYTQAPHKTVSLILDTPRVSKLEDFPMKYTLIPGFGYLIRQTEDHRVASLDSIGNLMVSPPVK  
AQQGDYPLGRVLIGGSFYPSSEGRDMNKGLREFVYAQQVQAPVELFSDWLMTGHMDQFMCFVPTNDKNNDQK

DFRLLASPSACFELFEQKQKEGYGNVTLFEDIGAEQLLSNGRESKTISQILADKSFREQNAYVEKCISLNR  
TLLKTELGLEDKIILIPQLFCLEQLTNVPSNQSTKLFARPYFPDMLQIIVLGKNLGIKPFPGPKIGTCC  
LEEKVCGLLEPLGLKCTFIDDFDCYLANIGDVCASAIINRVVFAFKWWWKMIP----  
>MGP\_CAROLIEIJ\_G0026723/1-682  
-----MSFQSTLSLSLVNPTHALCMVGMETLDISGCAPDKCKSFTIRGSPRILIHSS--VIADKED  
AIVWRPMNHPTALVRMVAPSSTVDEDKVLVSYFCPDKDVPTATAVLFTGIEVSLEADYRDGQLDMPCDK  
QAKKRWMWGLNGWGAILLNCSPNAVGP-DE-QS-FQEGPREIQNLSQMTLTVEGPTSILQNYQLILHTSE  
EEAKRRARVYWSQRG-SSAYELVVGPNKPVYLLPT----SENHGKEIFYVEATEFFSPSFSGLISFSLSLVEK  
THNQCIPEPLYKDTVMFRVAPYIFMPSTQMPLEVYLCRELQQLQGFVDSVTKLSEKSKVRVWTVYEDPNRQG  
NWLQDEMAFCYQAPHKTVSLILDTPRVFKLEDFPMKYSLSPGFGYLRQTEDHRVASLDSIGNLMVSPPVK  
AQQGDYPLGRVLIGGSFYPSSESMDMNGKREFVYAQQVQAPVELFSDWLMTGMDQFMCFVPTNDKNDQK  
DFRLLASPSACFELFEQKQKEGYGNVTLFEDIGAEQLLSNGRESKTISQILADKSFREQNAYVEKCISLNR  
TLLKTELGLEDKIILIPQLFCLEQLTNVPSNLQSTKLFARPYFPDMLQIIVLGKNLGIKPFPGPKIGTCC  
LEERVCELLEPLGLKCTFIDDFDYLANIGDVCASAIINRVVFAFKWWWKMTP----

>ENSRNOG00000037079/1-683  
-----MSFQSTLSLSLSDSPHAIACMVGMETLDISGCAPDKCESFTIRGSPRVLIHSS--VITGKED  
AVVWRPMKQPTALVRMVSPSTVDEDKVLVSYCPDKVPTATAVLFTGIEVSLEADYRDGQLDMPSDK  
QAKKRWMWGLNGWGAILLNCNPETPSQS-DE-QSGAQESPRIQNLSQMTLTVEGPTSILRDYQLLLHTSK  
EEAKTRVYWAHEG-ASAYELVVGPDKPFHILPT----FDTRGKETFYIEATEFFSPSFSGLISFVSLIEQ  
AHDQLIPETPLYKDTVMFRVAPYIFLPSTQLPLEVYLCRELQQLQGFVDSVTKLSEKSNVQVASVYEDPNRQG  
RWLQDEMAFCYQAPHKTVSLILDTPRVAKLEDFPMKYSLSPGVGYLIQETEDHRVASLDSVGNLIVSPPVK  
AQQGDYPLGRILIGGSFYPSFEGRDMKALRDFVYAQQVQAPVELFSDWLMTGHDVDFCFVDDKNSDRK  
GFRLLASPSACYELFEQKQKEGFGDVTLFEDVRAEQLISNGREVKTISQILADENLREQNAYVEKCISLNR  
TLLKTELGLVDNDFIRIPQLFCLEPLTNVPSNQSTKLFARPYFPDMLQIIVLGKNLGIKPFPGPKIGTCC  
LEETVCGLLEPLGLKCTFIDDFDCYLANIGDACASVIVNRVFAFKWWWKMNP----

>ENSNAG00000014612/1-682  
-----MSFQSTVRLSLSDSPTRVVCVLGMEISLDISGCAPKKCESFTIRGSPRVLIHICSS--VITGKED  
SIVWQPLSQSTEALVRMVSPSPAVDEDKVLVSYCYDDEETPAATAVLYLTGIEVSLEADYRDGQLDMPSDK  
QAKKKWMWGPSGWGAILLNCSPQAGQP-TG-QD-GKIFSEEIKNLSRMTLNVEGPNCILKNYRLVHTSE  
EEAATRVYVWPKDTCDFELVMGPGKPSYALSP----LEDGRKEIFYVEATEFFSASFGLISFSLVEG  
SQDLSIPDIPIYKDTVMFRVAPYIFTPSTQMPIEVYLCRELQQLQGFVDTVIRLSERSNVQVASVYEDPSRLG  
RWLQDEMAFCYQAPHKTVSLILDTPRVTKLEDYPMKYSLSPGVGYLRQTKHHQVTSLDTIGNLMVSPPVK  
AQQKEYPLGRILVGGSFYPSSESRTMSKDLRDFVCAQQVQAPVEIFSDWLMTGHVDEFMCFVPA-DKSENK  
GFRLLASPSACYELFEQKQKEGYGGATLFEDVRADQLLSNGREARTISQLLADKSLRKQNDYVEKCISLNR  
ALLKTELGLVDKDIITIPQLFCLEQLTNVPSDQQTSKSFARPYFPDMLQIIVLGKNLGIKPFPGPKIGTCC  
LEEKICQLLEPLGLKCTFIDDFDCYLANIGDSCACAIHVRVFAFKWWWKMIL----

>ENSJJAG00000019685/1-672  
-----MSFQSTLRLSLSDSPHAIACVGLGMEISLDISGCAPKKCEFFTIRGSPRVLIVHSSV--VITGKED  
AVVWRSLYHPTAVRVMSPSPPEVDDDKVLVSYCYDDEEVPMATALLYLTGIEVSLEADYRDGQLDMPSDK  
QAKKKWMWGPSGWGAILLNCNLMDEL-VN-KD-----NNIKLSRMTLSVKGPSCILKNYQLVHTSK  
EEASKTRVYCS-RG----LSLVLGPNKHFYALPP----LEDHGTETFYVEATEFFSASFGLISFVSLVER  
SRDVSIPDIPIYKDTVMFRVAPYIFTPSTQMPIEVYLCSELQQLQGFADTVSRLSERSDVHVSVYEDPSRLG  
RWLQDEMAFCYQAPHKTVSLILDTPRATEDYPMKYSLSPGIGYMTQNTEDHQVASLDSIGNMIVSPPVK  
AQQKEYPLGRVLLGSSFHPSSESRTMSKDLRDFLWAQQVQAPVELFSDWLMTGHVDEFMCFVPI-DDHEDRK  
GFRLLASPSACYNLLQEQKQEGYGDATLFGEVRTDQLHSNGREARTITQLLTDKSLRKQNDYVEKCICLNR  
TILKTELGLVEKDIIAIPQLFCLEQLTNVPSDQQTPKLFARAYFPNMLRMIVLGQNLGIPKPYGPQIKGTCC  
LEEKMCRLLEPLGLKCTFIDDFDCYLANIGDFCPCVSVRRAPFAFKWWWKMMP----

>ENSSTOG00000019498/1-674  
-----VHLTLDTPAHAICVGLGTEISLDIRCAPKNCQSFTVRASPRVLVDVAGT--VISGKED  
AVICRSLDTSVHLVLRMVSPSASVDEDKVLVSYHPNEEVPMATALLYLTGIEVNLEADYRDGQLEVPSPDK  
QAKKKWVWGPNGWGAILLNCSPANMSQI-TD-KS--KVFSDEIRKLSQMSLTVQGPSCILKNYKLILHTSK  
EEAETRVYRPQKD-SCAYQLVLGLGWHCHALGP----LETLRKETFYVEATEFFSASFGLVSVSVLVEE  
SQDLSIPEIPIYKDTVMFRVAPYIFTPSTQMPIEVYLCRELQQLQGFVNTVTELSEKSDSQVAPVYEDPNRLG  
RWLQDEMAFCYQAPHKTVSLILDTPRAVHLEDFPMKYSLSPGIGYMRIRTEDHRVASLDSIGNLMVSPPVK  
AHGKEYPLGRVLLIGSSFYPSAQGRAMSRTLQDFLCAQQVQAPVELFSDWLMTGHVDEFMCFVPI-DTKS-DKK  
GFRLLIASPSSCYKLFQEQKEEGYGEATLFEDIRADQLLANGRKARTINQLLADESRRQNDYVERCIDLNR  
AILKRELGLGEKDIIDVPLFCLELRTNIPSEQQTPKLLARAYFPNMLCMIVMDMNLGIPKPYGPQIKGICC  
LQEKVRLLEPLGLTCTFIDDFDCYLVTEVGFDCPCANVLRVFPDFKWWWKMVP----

>ENSUPAG00010017599/1-685  
VVSMECRAVAFQSTVHLTLDTPAHAICVGLGTEISLDIRCAPKNCQSFTVRASPRVLVDVAGT--VISGKED  
AVICRSLDTSVHLVLRMVSVXSASVDEDKVLVSYHPNEEVPMATALLYLTGIEFLWGS---PGPSPPENS  
WSQKKWVWGPNGWGAILLNCSPANMSQI-TD-KS--KVFSDEIRKLSQMSLTVQGPSCILKNYKLILHTSK  
EEAETRVYRPQKD-SCAYQLVLGLGWHCHTLGP----LENLQKETFYVEATEFFSASFGLVSVSVLVEE

SQDLLIPEIPIYKDTVFRVAPCIFTPTQMPLEVYLCRELQQLQGFVNTVTELSEKSNQVAPVYEDPNRLG  
RWLQDEMAFCYTOGPHRTVSFVLDTPRAINLEDFPMKYSLSPGIGYMRRTEDHRVASLDSIGNLMVSPPVK  
AHGKEYPLGRVLIGSSFYPSAQGRAMSKTLQDFLCAQQVQAPVELFSDWLMTGHVDEFMGMFVPIIDTKN-DKK  
GFRLLIASPSSCYKLFQEKQEEGYGEATLFEDIRADQLLANGRKARTINQLLADESRRQNDYVERCIDLNR  
AILKRELGLGEKDIIDVPQLFCLERLTNIPSDQQTPKLLARAYFPNMLCMIVMDMNLGIPKPFPGPQIKGICC  
LQEKVRLLEPLGLACTFIDDFDCYLTEVGDFCPCANVLRVPPDFKWWKMVP----

>ENSMG00000020848/1-685

---MECRAIAFQSTVHLSLDIPAHAICVLGTEISLDIRCAPKNCESTVRASPRVLVDVAGT--VISGKED  
AVICRSLDTSVHVLVSMVSPSVSDEDEKVLVSYHPNEEVPMTALLYLTGIEVNLEADYRDGQLEVPSPDK  
QAKKKWWWGPNWGWAILLVNCGPADVSI-TD-KS--KVFSDEIRKLSQMSLTVQGPSCILKNYKLVHTSK  
EEAEKTRVYRPQKD-SCAYQLVLGLGWHCHALGP----LENFQKETFYVEATEFSPASFSGLISFSVSLVEE  
SQDLLIPEIPIYKDTVFRVAPCIFTPTQMPLEVYLCRELQQLQGFVNTVTELSEKSDSQVAPVYEDPNRLG  
RWLQDEMAFCYTOGPHRTVSFVLDTPRAINLEDFPMKYSLSPGIGYMRRTEDHRVASLDSIGNLMVSPPVK  
AHGKEYPLGRVLIGSSFYPSAQGRAMSKTLQDFLCAQQVQAPVELFSDWLMTGHVDEFMGMFVPIIDTKS-DTK  
SFRLLIASPSSCYKLFQEKQEEGYGEATLFEDIRADQLLANGRKARTINQLLADKSLRRQNDYVERCINLNR  
AILKRELGLGEDDIIDVPQLFCLERLTNIPSDQQTPKLLARAYFPNMLCMIVMDMNLGIPKPFPGPQINGICC  
LQEKVRQLLEPLGLACTFIDDFDCYLTEVGDFCPCANVRRVPLDFKWWKMVP----

>ENSSVLG00005001183/1-688

--VSGGRAMSFQISVHLSLSDSPAHAICVLGMEISLDIRCAPKKNCESTVRASPRVLIDISGT--VITGKED  
AVICRTLSSTMHVLRMASPSLSVDEDEKVLVSYRPNNEEVPMTALLYLTGIEVSLKTDIYRDGQFEVPSDK  
QAKKKWWWGPNWGWAILLVNCSPTDVSQ-LD-KT-NKEFLDEMKNLSQMTLTVQGPSCILKNYKLVHTSE  
EEAEKARVYWAQKD-AFAFELVLGPRHCHALGP----LENHQKETFYVEATEFSPASFSGLISFSASVLEE  
SRDLLIPEIPIYKDTVFRVAPCIFTPTQMPLEVYLCRELQQLQGFVSSVTELSEKSNQVAPVYEDPSRLG  
RWLQDEMAFCYTOGPHRTVSFVLDTPRALELEDFPMKYSLSPGVGYVTRRTEDHRVASLDSIGNLMVSPPVK  
AQQKEYPLGRVLIGSSFYPSAEGRTMSRSLRDFLCAQQVQAPVELFSDWLMTGHVDEFMCFVPVDAKSEDKK  
GFRLLMASPSSCYELFQEKQEEGYGEAALFEEVRADQLLSNGREARTIDQLLADESRLKQNNYVERCLGLNR  
AVLKRELGLVEEDIIDVPQLFCLQLTNVPSDQQTPKLLARAYFPNMLRMIVMGTNLGIPKPFPGPQIKGICC  
LEGKIRQLLQPLGLMCTFIDDFDCYLTDVGDFCPCANVRRVPLFAFKWWKMVP----

>ENSHGLG00000019075/1-680

-----MSLQSVVQLSLSLSDSPVHVCVGLGSLVVDISGCAPKKNCESTVRASPRVLVLSQ--VTSGRDK  
TSIWHPLSEPMALVMVLPSSVDEDEKVLVSYRPNNEEVPMTALLYLTGIEVSLKTDIYRDGQFEVPSDK  
QMKKWLWGWPTGWGAILLVNCSPEAVNQD-----TKTVLSEDIKDLQMTLTVQGPSTALKNYKLVHTSE  
EEAEKARVYLPHGDTSGAFQIVLGPGENSHTFNP----LVNLGKETLYVEAIEFSPANFAGLISFSVSLIED  
SPVPSIPETPVYKDTVFRVAPCIFTPTQMPLEVYLYRDVKIQGFVDMVAALSEKTDSDQVSVYEDPNRLG  
RWLQDEMAFCYTEAPQKMTSFVLDTPRAIKLDEFPMKYALSPGVGYVIQHTKDHTVASLDTIGNLMVSPPVK  
AQQKEYPLGRVLFGSSFYPSAESRMMKSLCDFLHAQQVQAPVELFSDWLMTGHLDEFMCFVPEEKKESSK  
GFRLLASPRACYKLLQEKQEEGYGNATLFEGVSPSLLRSNGREAKTINQFLADKSLRNQNDYVERCIRLNR  
AILREKLGLEDIIDIPQLFCLQLTNVPSDQQPCRFARPYFPDVLRMIVMKGDLGIPKPFPGPQIKGTCC  
LEEKICQLLEPLGLKCTFIDDFDCYLTDVGDFCACTNIRRVPLFAFKWWKMVP----

>ENSODEG00000016131/1-673

-----MSHLSVHLSLSDVPHVGVVGLGSLVVDISGCAPKKNCESTVITCSPRVLVLSK--VTSGKDK  
ATVWHSLAEPVLCALVMVLPSSVDEDEKVLVSYRANEVPLTAVLYLTGIEVSLQTDVYRDG-HEMPVVK  
QTKETWVWGPAGWGWAILLVNCSPADVNP-----TQMVQRQPQKLLTQMTLSIQGPTCILKNYKLVHTSE  
EEAKKARVFWPHG-----ELLGPDNRNSYIFNP----LVNLGKETIYVEAIEFSPANFAGLISFSVSLIED  
PPISCLPEIPVYKDTVFRVAPCIFTPTQMPLEVYLYRDVKVQGFVDAVVALSEKTDSDQMASVYEDSNRSG  
KWLQDEMAFCYTEMPHKMSSVLDTPRAIALDDFPMKYALTPGIGYVTQDTKDHSVASLDTIGNLMVSPPVK  
AQQKDYPLGRVLFGSSFYPSIDGRDMSKSLRDFLYAQVQAPVELFSDWLMTGRLEEFMCFVVENQSGDAK  
DFRLLASPCACYLLREKQEEGYGDATLFEGVSPDLLHANGREAKTINQFLSDKSLKNQNDYAEKCIHLNR  
AILKEKLGLEDIIDVPQLFCLQLTNVPSDQQPHRLFARPYFPDMLRMVMGKELGIPKPFPGPQIKGTCC  
LEEKICHILLEPLGLKCTFIDDFDCYMTDVGDACACTNIRRVPLFAFKWWKMVP----

>ENSCLAG00000003328/1-672

-----MSHQSIHVHLSLSDVPHVGVVGLGSLVVDISGCAPKKNCESTVITCSPRVLVLSK--VTSGKDK  
AIVWHSLSKPVSALVMVLPSSVDEDEKVLVSYRANEVPLTAVLYLTGIEVSLQADVYRDGQHEMPVVK  
QTKETWVWGPAGWGWAILLVNCSPADVNSQD-----TKTVISEDIKDLQMTLSIQGPTCILKNYKLVHTSV  
EEADKARVYFWPHG-----EIVLGPGHNSYTFSP----LVNLGKETIYVEAIEFSPANFAGLISFSISLIED  
PP--SIPAPVYKDTVFRVAPCIFTPTQMPLEVYLYRDVKVQGFVDTVVALSEKTDSDQMASVYEDPSRQG  
RWLQDEMAFCYETPHKMTSFVLDTPRAAKLDEFPMKYALSPGVGYIIQDTKDHTVASLDTIGNLMVSPPVK  
AQQKEYPLGRVLFGSSFYPSIDGRDMSKSLRDFLYAQVQAPVELFSDWLMTGHVDEFMCFVVEDKGEDAK  
GFRLLASPCACYKLFREKQEEGHGDATLFEGVSTDLLHNSGREAKTINQFLADESLRNQNNYVEKCIHLNR  
AILKERLGLQEEIIDIPQLFCLQLTNVPSDQQPRKLFARPYFPDVLQMIVMGKDLGIPKPFPGPQIKGTCC  
LEEKICHILLEPLGLSCTFIDDFDCYLTDVGDSCACTNIRRVPLFAFKWWKMPLP----

>ENSCPOG00000024187/1-667

-----MSNQSVHLSLSDPAHGVVGLGSLVVDVSGCAPMNCESFTITCSSRVLVLSK--VTSGKDK

GIIWHSISDRRHALVRMVLPSSELEDEDKVLVSYYRANEEAPLATAVLYLTGIEVSLQTDVYRDGQQEMPINK  
QIKEKWWVWGPSGWGAVLLVNCSPADLRQE-----SKMVVSEHIKDLSQMTLNVNGPNCALKNYHLVLTHTSA  
EEAEKTRVYWPQG-----EVLGPDRESSYFTP----LENL-EETFYVEALEFSPASFSGLISFSISLIED  
PP-----GPVYKDTVFRVAPCIFTSTQMPLEMYLYRDVVKIQGFVDAVTALESEKSDSQVASVYEDFNRMG  
RWLQDEMAFCYTETPNKMMSFVLDTPRTTTPDEFPMKYALSPGVGYLIQNITDHTVASLDTIGNLMVSPPVK  
AQQKEYPLGRVLFSSFYPSSEGRAMSKNLRDFLYAQVQAPVELFSDWLMTGHVDEFMCFVPVEDKSNDSK  
GFRLLLASPCACYNLFRKQEEGFGGVLFGGVNPDTLHANGREAKTINQLLADQTMRNQNNYVEKCIHLNR  
AILKEKLGLEEDIIDVPLFCLEELTNVPSDQQPCKLFARPYFPDVLRMIVMGKDLGIPKPFPGPQIKGTCC  
LEEKICHILLEPLGLKCTFIDDFCYLTCVGDPCACTNIRRMPFAFKWWWNMVP----

>ENSODRG0000005081/1-658

-----MPVQHILHLSLSDSPVHAVCVLGMESVDINGCAPTECTSFTIHGSPGVIGSSST--AFTRKED  
TTVSRPLPSAHVPLQMLSLSFSEDEDKVEVSYFCPNEDSPAATAVLYLTSIYVSLDADIYRDGQLEMASDK  
LAKKKWWVWGPNGWGAILLVNCSVDLSQV-TD----KAIFSKEIKTLAEVTLTVQGPSSTLKNYGLVLTHTSE  
EEAKKIRIYWPQ-DAQSTFKLVGSPSQHFHTLSP----LES-MEQTLYAEAIDFPSSSFGLISFSLSLVEQ  
PQDSAIETPIYKDTVFRVAPCIFTSTQMPLEVLCREVQFTGSSEVLLRLS-----G  
SWLTDEMAFCYSQAPHGTISMVIDSPRTAKLEDFPMKYSLSPGISYMTHTSTEDHQVASLDSVGNMMVSPPVK  
AQQGDYPLGRILIGSSFYF---SRTMGKSLQAFLYAQVQAPLELFSDWLMTGHVDEFMCFVVEN-SRDTK  
DFRLLLASPSACYELFKKQREGYGNATLFEVVRTDQLISNGRKAKTIDQLLADEKLRKENDYVEKCIHLNR  
ILLKRELGLVEKDIIDIPQLFYLEKLTNIPSDQQTTLKFAKPYFPDLLQMIVMGNNLGIKPFPGPQIKGICC  
LEEKVCHLLEPLGLKCTFIDDFCYLTDVGDPCACTNIRRMPFAFKWWWNMVP----

>ENSOCUG00000025853/1-693

GVSLEGRAMSFQNTLCLSPDSPAHAICVLGTEINLDSRAAPDNCEFFTVSGSQRVLVNVCDV--VITEKEA  
ATIWWPLSDSTHVLVQMVSPSPAIVEDKVLVSYYRPEKEEPAATAVLYLTGIEVSLQVDVYRNGHMVQVTEK  
QEKEKWWVWGPKGRGPILLVNTGPANVDQL-IDKETNKVFLSDEIKNLSRMILNLQGPSCVLKRYRLVLTHTSR  
EEAEKARVYWPQKDGSSAFELVLPGRHSYTFTS----IENPLKETFYLEATEFSPASFSGLISYSASLVEE  
SEDPSIPETVYKDTVFRVAPCIFTSTQMPLEVLCRELQLQGFVNMVTELEKSNSQLASVYEDPNRLG  
RWLQDEMAFCYTQAPHKTVSLILDTPRATKLEDFPMKYSLSPGVGYVQHTEDHRVASMDSIGNLMVSPPVQ  
VQEKEYPLGRVLIGSSFYPSVEGRAMSKSLRDFLYAQVQAPVELFSDWLMGSHVDEFMCFVPTDDKSGSKK  
GFRLLLASPSCYNLFEKQKEGYGDAVLFEGVRGDQLLSNGREARTINQLLADESLRKQNDYVEKCLRLNR  
TILKSELGLAEEDIVEVPLFCLEQLSNVSEEQSRKPLARPYFPDLLQMIVMDKNLGVKPFPGPQIKGSCC  
LEQLCRLLEPLGFKCFIDDFCYLTDVGDPCACTNIRRMPFAFKWWWNMTP----

>ENSPTRG00000052623/1-693

MVSVEGRAMSFQSIHLSLSDSPVHAVCVLGEICLDLSGCAPQKQCFTIHGSGRVLIDVANT--VISEKED  
ATIWWPLSDPTYATVKMTSPSPMDADKVSVTYYGPNEDAPVGTAVLYLTGIEVSLEVDIYRNGQVEMSSDK  
QAKKKWIWGPSGWGAILLVNCPADVGGQLEDKTKKVFSEITNLSQMTLNVQGPCILTKYRLVLTHTSK  
EESKARVYWPQKDNSSFELVLPDQHAYTLA----LGNHLKETFYVEAIAFSPAEFSGLISYSVSLVEE  
SQDPSIPETVLYKDTVFRVAPCVFIPCTQVPLEVYLCRELQLQGFVDTVTKLSEKSNSQLASVYEDPNRLG  
RWLQDEMAFCYTQAPHKTVSLILDTPQAADLDEFPMKYSLSPGIGYMIQDTEDEHKVASMDSIGNLMVSPPVK  
VEGKEYPLGRVLIGSSFYPSAEGRAMSKTLRDFLYAQVQAPVELYSDWLMTGHVDEFMCFIPTDDKNEGKK  
GFRLLLASPSCYKLFREKQKEGYGDALLFDELRADQLLSNGREACTIDQLLADESLKKQNEYVEKCIHLNR  
DILKTELGLVEQDIIEIPQLFCEKLTNIPSDQPKRSFARPYFPDLLRMIVMGKDLGIPKPFPGPQIKGTCC  
LEEKICLLEPLGFKCTFINDFCYLTEVGDICACANIRRMPFAFKWWWNMVP----

>ENSPAG00000040946/1-694

MVSVEGRAMSFQSIHLSLSDSPVHAVCVLGEICLDLSGCAPQKQCFTIHGSGRVLIDVANT--VISEKED  
ATIWWPLSDPTYATVKMTSPSPMDADKVSVTYYGPNEDAPVGTAVLYLTGIEVSLEVDIYRNGQVEMSSDK  
QAKKKWIWGPSGWGAILLVNCPADVGGQLEDKTKKVFSEITNLSQMTLNVQGPCILTKYRLVLTHTSK  
EESKARVYWPQKDNSSFELVLPDQHAYTLA----LGNHLKETFYVEAIAFSPAEFSGLISYSVSLVEE  
SQDPSIPETVLYKDTVFRVAPCVFIPCTQVPLEVYLCRELQLQGFVDTVTKLSEKSNSQLASVYEDPNRLG  
RWLQDEMAFCYTQAPHKTVSLILDTPQAADLDEFPMKYSLSPGIGYMIQDTEDEHKVASMDSIGNLMVSPPVK  
VEGKEYPLGRVLIGSSFYPSAEGRAMSKTLRDFLYAQVQAPVELYSDWLMTGHVDEFMCFIPTDDKNEGKK  
GFRLLLASPSCYKLFREKQKEGYGDALLFDELRADQLLSNGREACTIDQLLADESLKKQNEYVEKCIHLNR  
DILKTELGLVEQDIIEIPQLFCEKLTNIPSDQPKRSFARPYFPDLLRMIVMGKDLGIPKPFPGPQIKGTCC  
LEEKICLLEPLGFKCTFINDFCYLTEVGDICACANIRRMPFAFKWWWNMVP----

>ENSG00000276747/1-694

MVSVEGRAMSFQSIHLSLSDSPVHAVCVLGEICLDLSGCAPQKQCFTIHGSGRVLIDVANT--VISEKED  
ATIWWPLSDPTYATVKMTSPSPMDADKVSVTYYGPNEDAPVGTAVLYLTGIEVSLEVDIYRNGQVEMSSDK  
QAKKKWIWGPSGWGAILLVNCPADVGGQLEDKTKKVFSEITNLSQMTLNVQGPCILTKYRLVLTHTSK  
EESKARVYWPQKDNSSFELVLPDQHAYTLA----LGNHLKETFYVEAIAFSPAEFSGLISYSVSLVEE  
SQDPSIPETVLYKDTVFRVAPCVFIPCTQVPLEVYLCRELQLQGFVDTVTKLSEKSNSQLASVYEDPNRLG  
RWLQDEMAFCYTQAPHKTVSLILDTPQAADLDEFPMKYSLSPGIGYMIQDTEDEHKVASMDSIGNLMVSPPVK  
VQKEYPLGRVLIGSSFYPSAEGRAMSKTLRDFLYAQVQAPVELYSDWLMTGHVDEFMCFIPTDDKNEGKK  
GFRLLLASPSCYKLFREKQKEGYGDALLFDELRADQLLSNGREACTIDQLLADESLKKQNEYVEKCIHLNR  
DILKTELGLVEQDIIEIPQLFCEKLTNIPSDQPKRSFARPYFPDLLRMIVMGKDLGIPKPFPGPQIKGTCC

LEEKICLLEPLGFKCTFINDFDCYLTEVGDICACANIRRVPAFAKWWWKMVP----

>ENSGGOG00000015257/1-694

MVSVEGRVMSFQSIHVLSLSDSPVAVCVLGTICLDLSDGAPQKQCQCFTHGSGRVLIDVANT--VISEED  
ATIWWPLSDPTYATVKMTSPSPSVDADKVSITYYGNEDAPVGTALVYLTGIEVSLEVDIYRNGQVEMSSDK  
QAKKKWIWGPGSWGAILLVNCPADVGGQLEDKTKKVFSEITNLSQMTLNVQGPSCILKRYRLVHTSK  
EESKKARVYWPQKDDSSSTFELVLPDQHVYTLAL----LGNHLKETFYVEAIAFSPAEFSGLISYSVSLVEE  
SQDPSIPETVLYKDTVFRVAPCVFIPCTQVPLEVYLCRELQLQGFVDTVTKLSEKSNSQVASVYEDPNRLG  
RWLQDEMAFCYTQAPHKTTSLILDTPQAADLDEFPMKYLSLPGIGYMIQDIEDHKVASMDSIGNLMVSPPVK  
VQGKEYPLGRVLIGSSFYPSAEGRAMSKTLRDFLYAQVQAPVELYSDWLMTGHVDEFMCFIPTDDKNEGKK  
GFLLLASPSACYKLFREKQKEGYGDALLFDELRADQLLSNGREAKTIDQLLADESLKKQNEYVEKCIHLNR  
DILKTELGLVEQDIIIEIPQLFCLEKLTNIPSDQQPKRPFARPYFPDLLRMIVMGKNLGIPKPFPGQIKGTCC  
LEEKICLLEPLGFKCTFINDFDCYLTEVGDICACANIRRVPAFAKWWWKMVP----

>ENSPPYG00000001806/1-694

VVSVEGRAMSFQSIHVLSLSDSPAHAVCVLGTICLDLSDGAPQKQCQCFTHGSGRVLINMANT--VISEEKED  
ATIWWPLSDPTYATVKMISPSVDGDKVSITYYGNEDAPVGTALVYLTGIEVSLEVDIYRNGQVEMSSDK  
QAKKKWIWGPGSWGAILLVNCPADVGGQLEDKTKKVFSEITNLSQMTLSVQGPCTCILKRYRLVHTSK  
EESKKARVYWPQKDNSSSTFELVLPDQHVYTLAL----LGSHLKETFYVEAIAFSPAEFSGLISYSVSLVEE  
SQDPSIPETLLYKDTVFRVAPCVFIPCTQVPLEVYLCRELQLQGFVDTVTELSEKSNSQVASVYEDPNRLG  
RWLQDEMAFCYTQAPHKTTSLILDTPQAADLDEFPMKYLSLPGVGYMIQDIEDHNVASMDSIGNLMVSPPVK  
VQGKEYPLGRVLIGSSFYPSAEGRAMSKTLRDFLYAQVQAPVELYSDWLMMSGHVDEFMCFIPTDDKNEGKK  
GFQLLASPSACYKLFREKQKEGYGDALLFDELRADQLLSNGREAKTIDQLLADESLKKQNEYVEKCIHLNR  
DILKTELGLVEQDIIIEIPQLFCLEKLTNIPSDQQPKRPFARPYFPDLLRMIVMGKNLGIPKPFPGQIKGTCC  
LEEKICLLEPLGFKCTFINDFDCYLTEVGDICACANIRRVPAFAKWWWKMVP----

>ENSNLEG00000007782/1-642

VVSVEGRAMSFQSIHVLSLSDSPAHAVCVLGTIEI-----YSAHGVG-----LCSR---

-----PLPSNTAYGFRMLSP-----QVSVTYGPNEDAPMGTAVALYLTGIEVSLEVDIYRNGQVEMSSDK  
QAKKKWIWGPGSWGAILLVNCPADVGGQLEDKTKKVFSEITNLSQMTLNVQGPSCILKRYRLVHTSK  
EESKKARVYWPQKDNSSSTFELVLPDQHVYTLAL----LGSHLKETFYVEAIAFSPAEFSGLISYSVSLVEE  
SQDPSIPETLLYKDTVFRVAPCVFIPCTQVPLEVYLCRELQLQGFVDTVTELSEKSNSQVASVYEDPNRLG  
RWLQDEMAFCYTQAPHKTTSLILDTPQAADLDEFPMKYLSLPGIGYMIQDIEDHKVASMDSIGNLMVSPPVK  
VQGREYPLGRVLIGSSFYPSAEGRAMSKTLRDFLYAQVQAPVELYSDWLMTGHVDEFMCFIPTDDKNEGKK  
GFQLLASPSACYKLFREKQKEGYGDALLFDELRADQLLSNGKGTPE-----AQN---RKCIHLNR  
DILKTELGLVEQDIIIEIPQLFCLEKLTNIPSDQQPKRPFARPYFPDLLRMIVMGKNLGIPKPFPGQIKGTCC  
LEEKICLLEPLGFKCTFINDFDCYLTEVGDICACANVRRVPAFAKWWWKMVP----

>ENSMLEG000000029519/1-694

MVSVEARMSFQSIHVLSLSDSPAHAVCVLGTICLDLSDGAPQKQCQCFTHGSGRVLIDVANT--VISEED  
ATIWWPLSDPTYATVKMISPSVDADKVSITYYGNEDAPVGTALVYLTGIEVSLEVDIYRSGQVEMSSDK  
QAKKKWIWGPGSWGAILLVNCPADVGGQPEDKTKKVFSEIKNLSQMTLSVQGPSCILKRYRLVHTSK  
EESKKARVYWPQKDNSSSTFELVLPDQHVYTLAL----LGNHLKETFYVEAIAFSPAEFSGLISYSASLVEE  
SQDPSIPETLLYKDTVFRVAPCVFVPCQVPLEVYLCRELQLQGFVDTVTELSEKSNSQVASVYEDPNRLG  
RWLQDEMAFCYTQAPHKTTSLILDTPQAADLDEFPMKYLSLPGIGYMIQDIEDHKVASMDSIGNLMVSPPVK  
VQEKEYPLGRVLIGSSFYPSAEGRAMSKTLRDFLYAQVQAPVELYSDWLMTGHVDEFMCFIPTDDKNEGKK  
GFQLLASPSACYKLFREKQKEGYGDALLFDELRADQLLSNGREARTIDQLLADESLKKQNEYVEKCIHLNR  
DILKTELGLVEQDIIIEIPQLFCLEKMTNIPSDQQPKRPFARPYFPDLLRMIVMGKNLGIPKPFPGQIKGTCC  
LEEKICRLEPLGFKCTFINDFDCYLTEVGDICACANVRRVPAFAKWWWKMVP----

>ENSPANG000000031439/1-694

MVSVEGRAMSFQSIHVLSLSDSPAHAVCVLGTICLDLSDGAPQKQCQCFTHGSGRVLIDVANT--VISEED  
ATIWWPLSDPTYATVKMISPSVDADKVSITYYGNEDAPVGTALVYLTGIEVSLEVDIYRSGQVEMSSDK  
QAKKKWIWGPGSWGAILLVNCPADVGGQPEDKTKKVFSEIKNLSQMTLSVQGPSCILKRYRLVHTSK  
EESKKARVYWPQKDNFSTFELVLPDQHVYTLAL----LGNHLKETFYVEAIAFSPAAGFSGLISYSASLVEE  
SQDPSIPETLLYKDTVFRVAPCVFVPCQVPLEVYLCRELQLQGFVDTVTELSEKSNSQVASVYEDPNRLG  
RWLQDEMAFCYTQAPHKTTSLILDTPQAADLDEFPMKYLSLPGIGYMIQDIEDHKVASMDSIGNLMVSPPVK  
VQEKEYPLGRVLIGSSFYPSAEGRAMSKTLRDFLYAQVQAPVELYSDWLMTGHVDEFMCFIPTDDKNEGKK  
GFQLLASPSACYKLFREKQKEGYGDALLFDELRADQLLSNGREARTIDQLLADESLKKQNEYVEKCIHLNR  
DILKTELGLVEQDIIIEIPQLFCLEKMTNIPSDQQPKRPFARPYFPDLLRMIVMGKNLGIPKPFPGQIKGTCC  
LEEKICRLEPLGFKCTFINDFDCYLTEVGDICACANVRRVPAFAKWWWKMVP----

>ENSCATG000000040335/1-694

MVSVEARMSFQSIHVLSLSDSPAHAVCVLGTICLDLSDGAPQKQCQCFTHGSGRVLIDVANT--VISEED  
ATIWWPLSDPTYATVKMISPSVDADKVSITYYGNEDAPVGTALVYLTGIEVSLEVDIYRSGQVEMSSDK  
QAKKKWIWGPGSWGAILLVNCPADVGGQPEDKTKKVFSEIKNLSQMTLSVQGPSCILKRYRLVHTSK  
EESKKARVYWPQKDNSSSTFELVLPDQHVYTLAL----LGNHLKETFYVEAIAFSPAEFSGLISYSASLVEE  
SQDTSIPETLLYKDTVFRVAPCVFVPCQVPLEVYLCRELQLQGFVDTVTELSEKSNSQVASVYEDPNRLG  
RWLQDEMAFCYTQAPHKTTSLILDTPQAADLDEFPMKYLSLPGIGYMIQDIEDHKVASMDSIGNLMVSPPVK

VQEKEYPLGRVLIGSSFYPSAEGRAMSKTLRDFLYAQVQAPVELYSDWLMTGHVDEFMCFIPTDDKNEGKK  
GFQLLLASPSACYKLFREKQKEGYGDALLFDELRADQLLSNGREARTIDQLLADESLLKQNEYVEKCIHLNR  
DILKTELGLVEQDIIIEIPQLFCLEKMTNIPSDQQPKRPFARPYFPDLLRMIVMGKNLGIKPFPGQIKGTCC  
LEEKICRLLLEPLGFKCTFINDFDCYLTEVGDICACANVRRVPFAFKWWWKMVP----

>ENSMUG00000022437/1-694

MVSVEGRAMSFQSIVRSLDSPAHAHVCVLGTEICLDLSGCAPQKQCFTIHGSGRVLIDVANT--VISEEED  
ATIWWPLSDPTYATVKMISPSVADKVSITYYGNEDAPVGTALVYLTGIEVSLEVDIYRSGQVEMSSDK  
QAKKKWIWGSPSGWGAILLVNCNPADVGGQPEDKTKKVFSEEIKNLSQMTLSVQGPSCILKYYRVLVHTSK  
EESKKARVYWPQKDNSSTFELVLPQGHAYTLAL----LGNHLKETFYVEAIAFPSAEFSGLISYSASLVEE  
SQDPSIPETLLYKDTVFRVAPCVFPCTQVPLEVYLCRELQLQGFVDAVTELSKNSQVASVYEDPNRLG  
RWLQDEMAFCYQAPHKTTSLILDTPQATDLDEFPMKYSLSPGIGYMIQDIEDHKVASMDSIGNLMVSPVVK  
VQEKEYPLGRVLIGSSFYPSAEGRAMSKTLRGFLYAQVQAPVELYSDWLMTGHVDEFMCFIPTDDKNEGKK  
GFQLLLASPSACYKLFREKQKEGYGDALLFDELRADQLLSNGREARTIDQLLADESLLKQNEYVEKCIHLNR  
DILKTELGLVEQDIIIEIPQLFCLEKMTNIPSDQQPKRPFARPYFPDLLRMIVMGKNLGIKPFPGQIKGTCC  
LEEKICRLLLEPLGFKCTFINDFDCYLTEVGDICACANVRRVPFAFKWWWKMVP----

>ENSMFAG00000002560/1-694

MVSVEGRAMSFQSIVRSLDSPAHAHVCVLGTEICLDLSGCAPQKQCFTIHGSGRVLIDVANT--VISEEED  
ATIWWPLSDPTYATVKMISPSVADKVSITYYGNEDAPVGTALVYLTGIEVSLEVDIYRSGQVEMSSDK  
QAKKKWIWGSPSGWGAILLVNCNPADVGGQPEDKTKKVFSEEIKNLSQMTLSVQGPSCILKYYRVLVHTSK  
EESKKARVYWPQKDNSSTFELVLPQGHAYTLAL----LGNHLKETFYVEAIAFPSAEFSGLISYSASLVEE  
SQDPSIPETLLYKDTVFRVAPCVFPCTQVPLEVYLCRELQLQGFVDAVTELSKNSQVASVYEDPNRLG  
RWLQDEMAFCYQAPHKTTSLILDTPQATDLDEFPMKYSLSPGIGYMIQDIEDHKVASMDSIGNLMVSPVVK  
VQEKEYPLGRVLIGSSFYPSAEGRAMSKTLRGFLYAQVQAPVELYSDWLMTGHVDEFMCFIPTDDKNEGKK  
GFQLLLASPSACYKLFREKQKEGYGDALLFDELRADQLLSNGREARTIDQLLADESLLKQNEYVEKCIHLNR  
DILKTELGLVEQDIIIEIPQLFCLEKMTNIPSDQQPKRPFARPYFPDLLRMIVMGKNLGIKPFPGQIKGTCC  
LEEKICRLLLEPLGFKCTFINDFDCYLTEVGDICACANVRRVPFAFKWWWKMVP----

>ENSMNEG000000039952/1-694

MVSVEGRAMSFQSIVRSLDSPAHAHVCVLGTEICLDLSGCAPQKQCFTIHGSGRVLIDVANT--VISEEED  
ATIWWPLSDPTYATVKMISPSVADKVSITYYGNEDAPVGTALVYLTGIEVSLEVDIYRSGQVEMSSDK  
QAKKKWIWGSPSGWGAILLVNCNPADVGGQPEDKTKKVFSEEIKNLSQMTLSVQGPSCILKYYRVLVHTSK  
EESKKARVYWPQKDNSSTFELVLPQGHAYTLAL----LGNHLKETFYVEAIAFPSAEFSGLISYSASLVEE  
SQDPSIPETLLYKDTVFRVAPCVFPCTQVPLEVYLCRELQLQGFVDTVTELSKNSQVASVYEDPNRLG  
RWLQDEMAFCYQAPHKTTSLILDTPQATDLDEFPMKYSLSPGIGYMIQDIEDHKVASMDSIGNLMVSPVVK  
VQEKEYPLGRVLIGSSFYPSAEGRAMSKTLRGFLYAQVQAPVELYSDWLMTGHVDEFMCFIPTDDKNEGKK  
GFQLLLASPSACYKLFREKQKEGYGDALLFDELRADQLLSNGREARTIDQLLADESLLKQNEYVEKCIHLNR  
DILKTELGLVEQDIIIEIPQLFCLEKMTNIPSDQQPKRPFARPYFPDLLRMIVMGKNLGIKPFPGQIKGTCC  
LEEKICRLLLEPLGFKCTFINDFDCYLTEVGDICACANVRRVPFAFKWWWKMVP----

>ENSCSAG00000000865/1-694

MVSVEGRAMSFQSIVRSLSPAHAHVCVLGTEICLDLSGCAPQKQCFTIHGSGRVLIDVANT--VISEEED  
ATIWWPLSDPTYATVKMISPSVADKVSITYYGNEDAPVGTAVVYLTGIEVSLEVDIYRSGQVEMSSDK  
QAKKKWIWGSPSGWGAILLVNCNPADVGGQPEDKTKKVFSEEIKNLSQMTLSVQGPSCILKYYRVLVHTSK  
EESKKARVYWPQKDNSSTFELVLPQGHAYTLAL----LGNHLKETFYVEAIAFPSAEFSGLISYSASLVEE  
SQDPSIPETLLYKDTVFRVAPCVFPCTQVPLEVYLCRELQLQGFVDTVTELSKNSQVASVYEDPNRLG  
RWLQDEMAFCYQAPHKTTSLILDTPQATDLDEFPMKYSLSPGIGYMIQDIEDHKVASMDSIGNLMVSPVVK  
VQEKEYPLGRVLIGSSFYPSAEGRAMSKTLRDFLYAQVQAPVELYSDWLMTGHVDEFMCFIPTDDKNEGKK  
GFQLLLASPSACYKLFREKQKEGYGDALLFDELRADQLLSNGREAKTIDQLLADESLLKQNEYVEKCIHLNR  
DILKTELGLVEQDIIIEIPQLFCLEKMTNIPSDQQPKRPFARPYFPDLLRMIVMGKNLGIKPFPGQIKGTCC  
LEEKICRLLLEPLGFKCTFINDFDCYLTEVGDICACANVRRVPFAFKWWWKMVP----

>ENSRROG000000039820/1-694

MVSVAGRAMSFQSIVRSLDSPAHAHVCVLGTEICLDLSGCAPQKCECFTIHGSGRVLIDVANT--VISEEED  
ATIWWPLSNPTYATVKMISPSVADKVSIAIYGNEDAPVGTAVVYLTGIEVSLEVDIYRSGQVEMSSDK  
QAKKKWIWGSPSGWGAILLVNCNPADVGGQPEDKTKKVFSEEIKNLSQMTLSVQGPSCILKYYRVLVHTSK  
EESKKARVYWPQKDNSSTFELVLPQGHAYTLAL----LGNHLKETFYVEAIAFPSAEFSGLISYSASLVEE  
SQDPSIPETLLYKDTVFRVAPCVFPCTQVPLEVYLCRELQLQGFVDTVTELSKNSQVASVYEDPNRLG  
RWLQDEMAFCYQAPHKTTSLILDTPQATDLDEFPMKYSLSPGIGYMIQDIEDHKVASMDSIGNLMVSPVVK  
VQEKEYPLGRVLIGSSFYPSAEGRAMSKTLRDFLYAQVQAPVELYSDWLMSGHVDEFMCFIPTDDKNEGKK  
GFQLLLASPSACYKLFREKQKEGYGDALLFDELRADQLLSNGREAKTIDQLLADESLLKQNEYVEKCIHLNR  
DILKTELGLVEQDIIIEIPQLFCLEKMTNIPSDQQPKRPFARPYFPDLLRMIVMGKNLGIKPFPGQIKGTCC  
LEEKICRLLLEPLGFKCTFINDFDCYLTEVGDICACANVRRVPFAFKWWWKMVP----

>ENSRBIG000000035034/1-694

MVSVAGRAMSFQSIVRSLDSPAHAHVCVLGTEICLDLSGCAPQKCECFTIHGSGRVLIDVANT--VISEEED  
ATIWWPLSNPTYATVKMISPSVADKVSIAIYGNEDAPVGTAVVYLTGIEVSLEVDIYRSGQVEMSSDK  
QAKKKWIWGSPSGWGAILLVNCNPADVGGQPEDKTKKVFSEEIKNLSQMTLSVQGPSCILKYYRVLVHTSK

EESKKARVYWPQKDNSSTFELVLGPGQHAYTLAL----LGNHLKETFYVEAIAFPSAEFSG LISYSASLVEE  
SQDPSIPETLLYKDTVFRVAPCVFIPCTQVPLEVYLCRELQLQGFDVTTELSEKSNSQVASVYEDPNRLG  
RWLQDEMAFCYQAPHKTTSLILDTQATDLDEFPMKYSLSPGIGYMIQDTEHDKVASMDSIGNLMVSPPVK  
VQEKEYPLGRVLIGSSFYFSTEGRAMSKTLRDFLYAQVQAPVELYSDWLMGSHVDEFMCFIPTDDKNEGRK  
GFQLLASPSACYKLFREKQKEGYGDALLFDELADQLLSNGREAKTIDQLLADESLLKQNEYVEKCIHLNR  
DILKTELGLVEQDIIIEIPQLFCLEKLTNIPSDQQPKRPFARPYFPDLLRMIVMGKNLGIPKPFPGPQIKGTCC  
LEEKICRLLLEPLGFKCTFISDFDCYLADVGDICACANVRRVPPFAFKWWWKMVP----

>ENSCCAG00000036970/1-693

KVSVEGQAMSFQNIIRLSLDSPAHAVCVMGTEICLDLSCAPEKQCQCFIRGSGRVMIDVANT--VISEKES  
ATIWWPLSDATYATVKMISPSMDGDKVSVKYYGLNEDAPVGKAVLYLTGIEVSLEADIYRNGQVEVSRDK  
QAKKKWTWGPSGWGAILLVNCPADAGQQLD-KTNRVIFSEEIKNLSQMTLKVQGPSCLLKKYRLVLTSE  
EESKKARVYWRKDNSSTFELVLGSPQHAYTLAL----LGDHLKETFYLEAMVFPSAEFSG LITYSVSLVEE  
SQDPLIPETPLYKDTVFRVAPCIPCTQVPLEVYLCRELQLQGFDVTTELSEKSNSQVASVYEDPSRLG  
RWLQDEMAFCYQAPHKTTSLILDTPRAPNLDEFPMKYSLSPGIGYMTHTEDHDKVASMDSIGNVMVSPPVK  
VQGKEYPLGRVLMGSSFYPSVEGRAMSKTLRDFLYAQVQAPVELYSDWLMTGHVDEFMCFIPTDEKSEGKK  
GFQLLASPGACYKLFQEKQKEGYGDAFLFDGVRADQLLSNRREAKTIDQLLADESLLKQNEYVEKCIHLNH  
DILKTELGLVEQDIIIEIPQLFCLEKLTNIPSDQQPKRPFARPYFPNLLQMIVMGKNLGIPKPFPGPQIKGTCC  
LEEKIRFLLLEPLGFKCTFISDFDCYLADVGDICACATVRRVPPFAFKWWWKMVP----

>ENSCJAG00000007733/1-693

KVSVEGQAMSFQNIIRLSLDSPAHAVCVIGTEICLDISRAPEKQCQCFIRGSGRVMIDVANT--VFSEKES  
ATIWWPLSDTPYATVKMISPSMDGDKVSVKYYGLNEDAPVGKAVLYLTGIEVSLETDIYRNGQVEVSRDK  
QAKKKWTWGPSGWGAILLVNCPADAGQQLD-ETKRVIFSEEIKNLSQMTLNVQGPSCLLKKFRLVLTSE  
EESKKARVYWRKDNSSTFELVLGSPQHAYTLAL----LGDHLKETFYLEAMEFPSAEFSG LITYSVSLVEE  
SQDPLIPETPLYKDTVFRVAPCIPCTQVPLEVYLCRELQLQGFDVTVMELSKKSNSQVASVYEDPSRLG  
RWLQDEMAFCYQAPHKTTSLILDTPRAPNLDEFPMKYSLSPGIGYMIHDTEDHDKVASMDSIGNVMVSPPVK  
VQGKEYPLGRVLIGSSFYPSMEGRAMSKTLRDFLYAQVQAPVELYSDWLMTGHVDEFMCFIPTDDKSEGKK  
GFQLLASPGACYKLFQEKQKEGYGDAFLFDGVRADQLLSNRREAKTIDQLLADESLLKQNEYVEKCIHLNH  
DILKTELGLVEQDIIIEIPQLFCLEKLTNIPSDQQPKRPFARPYFPNLLRMIVMGKNLGIPKPFPGPQIKGTCC  
LEEKIRCLLEPLGFKCTFISDFDCYLADVGDICACATVRRVPPFAFKWWWKMVP----

>ENSCCAG000000026784/1-571

-----MDSVTKVPHHTASSQVALNVLP PPPKRLQ-----

-----SEPTYQWTS-VSPSCEKH-----TL-----TEMSSHL

QATKKWTWGPSGWGAILLVNCPADAGQQLD-KTNRVIFSEEIKNLSQMTLKVQGPSCLLKKYRLVLTSE  
EESKKARVYWRKDNSSTFELVLGSPQHAYTLAL----LRDHLKETFYFKAMVFPSAEFSG LITYSVSLVEE  
SQDPLIPETLLYKDTVFRVAPCIPCTQVPL----CRELQLQGFDVTTELSEKSNSQVAS-----  
----DEMVFICYTQARHKTTSLILDTPRAPKLDEFPMKYSLSPGIGYMTHTEDHDKVASMDSIGNVMMSPPVK  
VQGKEYPLGRVLIGSSFYPSMEGRAMSKTLRDFLYDQVQAPVELYSDWLMTSHLDEFMCFIPTDEKSEGKK  
GFQLLASPSACYKLFQEKQKEGYGDAFLFDGVRADQLLSNRR-----EKCIHLNH  
DILKTELGLVEQDIIIEIPQLFCLEKLTNIPSDQQPKRPFARPYFPNLLQMIVMGKNLGIPKAFGPQIMGTCC  
LEEKMRCLLEPLGFKCTFISDFDCYLADVGDICACATVRRVPPFAFKWWW SAPPGGRA

>ENSSBOG00000030271/1-692

-VSEVEGQAMSFQNIIRLSLDSPAHAVCVIGTEICLDLSCAPEKQCQCFIRGSGRVMIDVANT--VISEKES  
ATIWWPLSDTTYATVKMISPSMDGDKVSVKYYGLNEDAPVGKAVLYLTGIEVSLEADIYRNGQVEVSRDK  
QAKKKWTWGPSGWGAILLVNCPADAGQQLD-KTKRVIFSEEIKNLSQMTLKVQGPSCLLKKYRLVLTSE  
EESKKARVYWRKDDSSSTFELVLGSPQHAYTLAL----LGDHLKETFYLEAMVFPSAEFSG LITYSVSLVEE  
SEDPLIPETPLYKDTVFRVAPCIPCTQVPLEVYLCRELQLQGFDVTTELSKKSNSQVASVYEDPSRLG  
RWLQDEMAFCYQAPHKTTSLILDTPRAPNLDEFPMKYSLSPGIGYMTHTEDHDKVASMDSIGNVMVSPPVK  
VQGKEYPLGRVLIGSSFYPSVEGRAMSKTLRDFLYAQVQAPVELYSDWLMTGHVDEFMCFIPTDEKSEGKK  
GFQLLASPSACYKLFQEKQKEGYGDAFLFDGVRADQLLSNRREAKTIDQLLADESLLKQNEYVEKCIHLNH  
DILKTELGLVEQDIIIEIPQLFCLEKLTNIPSDQQPKRPFARPYFPNLLQMIVMGKNLGIPKPFPGPQIKGTCC  
LEERMRCLEPLGFKCTFISDFDCYLADVGDICACATVRRVPPFAFKWWWKMVP----

>ENSANAG00000033689/1-633

-----QAMSFQNIIRLSLDSPAHAVCVIGTEICLDLSSRGP--CR-----ETSEAIT

GNQGYPPRLGTWPRALLAPSP-----QVSVKYYGLNEDAPVGKAVLYLTGIEVSLEADIYRNGQVEVSRDK  
QAKKKWTWGPSGRGAILLVNCPADASQQLD-KTKRVIFSEEIKNLSQMTLNVQGPSCLLKKYRLVLTSE  
EESKKARVYWRKDNSSTFELVLGSPQHAYTLAL----LGDHLKETFYLEAMVFPSAEFSG LIAYSVSLVEE  
SQDPLIPETPLYKDTVFRVAPCIPCTQVPLEVYLCRELQLQGFDVTTELSEKSNSQVASVYEDPSRLG  
RWLQDEMAFCYQAPHKTTSLILDTPRAPSLDEFPMKYSLSPGIGYMTHTEDHDKVASMDSIGNVMVSPPVK  
VQGKEYPLGRVLIGSSFYPSATGVSHHAQLR-----KLASD-----SSFL-----SQ  
GFQLLASPGACYKLFQEKQKEGYGDAFLFDGVRADQLLSNRREAKTIDQLLADESLLKQNEYVEKCIHLNH  
DILKTELGLVEQDIIIEIPQLFCLEKLTNIPSDQQPKRPFARPYFPNLLRMIVMGKNLGIPKPFPGPQIKGTCC  
LEEKMRCLLEPLGFKCTFISDFDCYLADVGDICACATVRRVPPFAFKWWWKMVP----

>ENSPSMG00000006237/1-673

-----MSFQNIIRLSLDNPAHAVCVLGESEIYVDVSGCAPQMCECFTIRGSGRVLIDIADT--MITDKED  
ATIWWPLTEPTYAIVKMTSPSPFMVDGDKVSL---GQRDEGCLG-----EVSLEVDIYRNGQVGLPSDR  
KAKKKWTWGPNGWGAILLVNCSADTGQP-EDGKTKTVLLSEEIKNLSQMTLNVQGPSYTLKKYQLILHTSE  
EESKKARVYWPQKDSSTHFEVLVLPQGHTYTLAL----LGNQLKETLYVEATEFPSASFGLISYSASLVEE  
SQDPAIPETPVYKDTVFRVAPCIFLPSTQMPLEVLVYLCRELQVQGFVNTVTELSEKSNFQVATVYEDPNRMG  
RWLQDEMAFCYTQAPHKTISFVLDTPRAISLEEISMKYSLSPGVGYMIQHTKDQRVASMDSIGNLMVSPPVK  
VQGKEYPLGRVLIGSSFPSTEGRAMSDTLRDFLYAQVQVAPVEVSDWLMTGHMDEFMCFVPIDDKSDGKK  
SFQLLLASPSACYKLFQEKQKQGYGNALLFDEVRGDQLLSNGREAKTIDQFLADENLRKQNEAECILLNR  
DILKTELGLVEKDIIDIPQLFCLARLTVNPSDQQTQRPVFRPYFPDLLQMIVIGKTLGIPKPFQIKGTCC  
LEERVQCLLEPLGFNCTFIDDFDCYLTEVGDLCACANIRRVPPFAFKWWWKMVP----

>ENSPCOG0000005699/1-657

-----MSFQNIIRLSLDNPHAVCVLGESEIYVDLSGCAPQLCECFTIRGSGRVLIDIADT--MITDKED  
ATIWWPLTEPTYAIVKMTSPSPFMVDGDKVLVYTYGNEEMSLGTAVLFLTG-----IGECWHS  
RGPKKWTWGPNGWGAILLVNCSADAGQL-EDR-TKKVLLSEEIKNLSQMTLNVQGPSYTLKKYQLVLTHTSE  
EESKKARVYWPQKDSSTHFEVLVLPQGHTYTLAL----LGNHLKETLYVEAMEFPSASFGLISYSASLVEE  
SQDPSIPEIPVYKDTVFRVAPCIFLPSTQMPLEVLVYLCRELQVQGFVNTVTELSEKNNFQVAVYEDPNRLG  
RWLQDEMAFCYTQAPHKTISFVLDTPRAISLEEISMKYSLSPGVGYMIQYTKDHRVASMDSIGNLMVSPPVK  
VQGKEYPLGRVLIGSSFPYSAEGRDMSDTRLDFLYAQVQVAPVELYSDWLMMSGHMDEFMCFVPIDDKSDGKK  
VCGGLGAGPS----LPSSGQHRPTGLP-----ALLPTGREAKTIDQFLADENLRKQNEAECILLNR  
DILKTELGLVEKDIIDIPQLFCLARLTVNPSDQQTQRPVFRPYFPDLLQMIVMGKTLGIPKPFQIKGTCC  
LEEKVCHLLEPLGFKCTFIDDFDCYLTDVGDLCACANIHRVPPFAFKWWWKMVP----

>ENSMICG00000014075/1-677

-----MSFQNIIRLSLDDPAHAVCVLGESEIYVDVSGCAPQMCECFTIHGSGRVLIDIADT--MITDKED  
ATIWWPLTEPTYAIVKMTSPSPFMVDGDKVLVYTYGNEEMSLGTAVLYLTGIDVSLEVDIYRTGQVGLPSDK  
KAKKKWTWGPNGWGAILLVNCSADPGQL-EDQ-TKKVLLSDEIKNLSQMMMLNVQGPSYTLKKYQLVLTHTSE  
EESKKARVYWPQKDSAHTEFELVLPQGHTYTLPL----LGNHLKETLYVEATEFPSASFGLISYSASLVEE  
SQDPLIPEVYKDTVFRVAPCIFLPSTQMPLEVLVYLCRELQVQGFVNTVTELSEENHFQVAVYEDPNRLG  
KWLQDEMAFCYTQAPHKTISFVLDTPRAILLEEISMKYSLSPGVGYMIQETKDHTVASMDSIGNLMVSPPVK  
VQGKEYPLGRVLIGSRFYPYSAEGRAMSEALRDFLYAQVQVAPVELYADWLMMSGHMDEFMCFVPIDDKSDGKK  
SFQLLASPRACYTLLEKQKQKQGYGNALLFDEVRGDQLLSNGREAA--FLTSPSLPA----PQKICILLNR  
EILKTELGLVEKDIIDIPQLFCLARLTVNPSDQQTQRPVFRPYFPDLVLRMIVMGKTLGIPKPFQIKGTCC  
LEEKVCHLLEPLGFKCTFIDDFDCYLTDVGDLCACANIHRVPPFAFKWWWKTVP----

>ENSOGAG00000014538/1-683

-----MLFQNIIRLSLDNPAHAVCVLGESEIYVDVSGCAPQMCECFTIHGSGRVLIDIADT--MITDKED  
ATIWWPLSDPTYAVKMTSPSPAVDGDKVLVYTYGPHEN-TLGTAVLYLTGIAVSLEVDIYRNGQIVTPEDR  
KSKKKWIWGPNGCGAILLVNCSADPAEIGQL-EN-KTKKVFPEEMKNLSLMTVTIQGPSLLRRYQLVLTHTSE  
EESKKARVYWPQKDSAHTEFELVLPQGHTYTLPL----LGNHLKETLYVEATEFPSASFGLISYSASLVEE  
SQDLSIPETPVYKDTVFRVAPCIFIPSTQMPLEIYLCRELQVQGFVNTVVELSERSNFQMASVYEDPNRLG  
KWLQDEMAFCYTQAPHKTISLVLDTPRATDLEDFPMKYSLSPGVGYVIYTTQDQRVASMDSIGNLTVSPPVK  
VQGKEYPLGRILIGSSFPSEEGRAMSNTLRDFLCAQVQVAPVELYSDWLMMSGHMDEFMCFVPTDDKSEGRK  
GFQLLASPRACYTLLEKQKQKQGYGNALLFNEVRQDQLLSNGREFKTIDQLLADENLRKQNEVEKCIQLNR  
DILKTELGLVEKDIIDIPQLFCLARLTVNPSDQQTQRPVFRPYFPDLLQMIVLGNLGLIPKPFQIKGTCC  
LEEHVRLHLEPLGFKCTFIDDFDRLYLDIGDLCACANIRRVPPFAFKWWWKMVP----

>ENSUMAG00000021304/1-683

-----MSFQSLVHLSLSDSPVHALCVLGMIEICLDLNGCAPEKCKSFTVSGSPGLVDILRTPAVSREEA  
APTRWPLSHPIDVLVKMSPSSAIDSDKVLVSYLLPDEDVPVAVLYVTGVMVSLDVIYRSGQVEMASDK  
QAKKKWWWGPPSGWGAILLVNCSADKQGI-VDKKTKVFFPEEIKSLSQMTLNVQGPQDGLKKYRLVLTHTSK  
EEAEKARVYRPNSSSTFEMLLGPRHAYTFAP----LEDPLKETFYVEAVEFPSADFSGLISYSVSLVEE  
SQDPSIPETLVYKDTVFRVAPCIFTSTQMPLEVLVYLCRELQVQGFVNTIMELSEKSNFQVAVYEDPNRLG  
RWLQDEMAFCYTQAPHKTLVLDTPRVLMLDDIPMKYSLSPGVGYMIQGTKDHRVASMDSIGNLMVSPPVQ  
VED-----IIGSCFYPSKEGRDMGKALRDFLYAQVQVAPVELFSDWLMVGHVDEFMCFVPTQDKSQGGK  
GFRLLLASPSSCYRLFEEKQKEGYGDMTLFEEVQEDQLLSTGREANSISQLLADENMRKQNNYVEKCVNLNR  
AILKTELGLVERDIIDIPQLFCLARLTVNPSNEQMAKLFARPYFPNLLQMIVMDKHLGIPKPFQIKGTCC  
LEEKICQLLEPLGFQCTFIKDFDCYLTEIGDFCACANIRRVPPFAFKWWWKMPPEPQA

>ENSUAMG00000014926/1-691

-----MSFQSLVHLSLSDSPVHALCVLGMIEICLDLNGCAPEKCKSFTVSGSPGLVDILRTPAVSREEA  
APTRWPLQHPIDVLVKMSPSSAIDSDKVLVSYLLPDEDVPVAVLYVTGVMVSLDVIYRSGQVEMASDK  
QAKKKWWWGPPSGWGAILLVNCSADKQGI-VDKKTKVFFPEEIKSLSQMTLNVQGPQDGLKKYRLVLTHTSK  
EEAEKARVYRPNSSSTFEMLLGPRHAYTFAP----LEDPLKETFYVEAVEFPSADFSGLISYSVSLVEE  
SQDPSIPETLVYKDTVFRVAPCIFTSTQMPLEVLVYLCRELQVQGFVNTIMELSEKSNFQVAVYEDPNRLG  
RWLQDEMAFCYTQAPHKTLVLDTPRVLMLDDIPMKYSLSPGVGYMIQGTKDHRVASMDSIGNLMVSPPVQ  
VEGKEYPLGRILIGSCFYPSKEGRDMGKALRDFLYAQVQVAPVELFSDWLMVGHVDEFMCFVPTQDKSQGGK  
GFRLLLASPSSCYRLFEEKQKEGYGDMTLFEEVQEDQLLSTGREANSISQLLADENMRKQNNYVEKCVNLNR



AILKKELGLVERDIIDLPLQFLCQLEQLTNVPSNEQMAKLLARPYFPNLLQMIVMDKHLGIPKPFPGPQVKGTC  
LEEKICQLEPLGFQCTFIEDFDCYLTEIGDFCACANVRRVPPFAFKWWRMVPEPQA  
>ENSAMEG0000000749/1-698  
VVSLEGRVMSFQSLVHLSLSDSPVHALCVLGMETCLDLNGCAPEKCKSFTVSGSPGLVDILDTPAVSREEA  
APTRWPLSHPIDVLVKMTSPSSAIDSDKVLVSYLPEDEDVPVATAVHLTGMVMSLVDVDIRSGQVEMASDK  
QAKKKWWWGPGSWGAILLVNCS PADKQI-VD-KTKVFFPPEEIKSLSQMTLNVQGPGLTKKYRVLVHTSK  
EEAEKARVYRQDRSSSTFEMLLGPRHAYTFAP----LEDPLKETFYVEAVEFPSADFSGLISYSVSLVEE  
SQDPSVPETLVYKDTVFRVAPCIFTPTSTQMPLEVYLCRELQVQGFVNTVMELSEKSNQVAVSYEDPNRLG  
RWLQDEMAFCYTQAPHKTLVLDTPRVLMLDDIPMKYSLSPGVGYMIQGTKDHRVASMDSIGNLMVSPPVQ  
VEGKEYPLGRILTGSCFYPSKEGRDMGKALRDFLYAQRVQAPVELFSDWLMVGHVNEFMCFVPTQDKSQGDK  
GFRLLASPSACYRLFEEKQKEGYGDMTLFEEVQEDQLLSTGREANSISQLLADENMRKQNDYVEKINLNR  
AILKKELGLVERDIIDLPLQFLCQLEQLTNVPSNEQMAKLFARPYFPNLLQMIVMGKHLGIPKPFPGPQVKGTC  
LEEEICQLEPLGFQCSFIEDFDCYLTEIGDFCACANVRRVPPFAFKWWRMVPEPQA  
>ENSNVIG00000014111/1-696  
VDGLEGRAMSFQSIIVRLSLSDSPVHALCVLGTICLDINGCAPEKCKSFTVSGSPGLVDVPNTVQAGSGEEA  
APTRWPLSHPIDVLVKMTAPSSAIDGDKVSVSYLSDEDVPVATAVLCVTGIVVSLDLDVDIRTQVQMTSDK  
QAKKNWWWGPGSWGAILLVNCS PADKQI-VDKKTKVFLPEEIQSLSQMTLNVQGPSCALKKYRLLHTSK  
EEAEKARVYRQDRSSSTFEMLLGPRSTYSLTP----LEKPLKETFYVEAVEFPSASFGLISYSVSLLEE  
SQDPSIPETLAVYKDTVFRVAPCVFTPTSTQMPLEVYLCRELQVEGFVNTVMELSEKSNQVAVSYEDPNRLG  
RWLQDEMAFCYTQAPHKTVSLVLDTPRVLTLDDFPMKYSLSPGVGYLIQRTKDRVASMDSIGNLMVSPPVK  
VEGKEYPLGRILIGSSFYPSKEGRDMGKALRDFLYAQRVQAPVELFSDWLMAGHVDEFMCFIPTRDKSEGDK  
GFRLLASPSACYRLFEEKQKEGYGDMTLLEEVREDQLLSNGREASTINQLLMDGNLRKQNNYVEKINLNR  
DLLKELGLVEKDIIDIPQLFCLEQLTNVPSNEQAKLFARPYFPNLLQMIVMDKNLGIKPFPGPQIKGICC  
LEEKIRQRLLEPLGFQCTFIDDFDCYLTEIGDFCACANIRRVPPFAFKWWRMVPEPQA  
>ENSMPIUG00000016211/1-695  
VDGLEGRAMSFQSIIVRLSLSDSPVHALCVLGTIDICLDINGCAPEKCKSFTVSGSPGLVDVPNTVQAGSGEEA  
APTRWPLSHPIDVLVKMTAPSSAIDGDKVSVSYLSDEDVPVATAVLCVTGIVVSLDLDVDIRTQVQMTSDK  
QAKKNWWWGPGSWGAILLVNCS PADKQI-VDEKTKVFLPEEIQSLSQMTLNVQGPSCALKKYRLLHTSE  
EEAEKARVYRQDRSSSTFEMLLGPRSTYTLTP----LESPLKETLYVEAVEFPSASFGLVSYVSLLEE  
SQDPSIPETLAVYKDTVFRVAPCVFTPTSTQMPLEVYLCRELQVEGFANTVMELSEKSNQVAVSYEDPNRLG  
RWLQDEMAFCYTQAPHKTVSLVLDTPRVLTLDDFPMKYSLSPGVGYVIQHTKDRVASMDSIGNLMVSPPVK  
AEGKEYPLGRILIGSSFYPSKEGRDMGKALRDFLYAQRVQAPVELFSDWLMAGHVDEFMCFIPTQDKSEGDK  
GFRLLASPSACYRLFEEKQKEGYGDMTLLEEVREDQLLSNGREASTINQLLTDENLRKQNNYVEKINLNR  
DILKEELGLGEEDIVHIPQLFCLEQLTNVPSNEQAKLFARPYFPNLLQMIVMDKNLGIKPFPGPQIKGICC  
LEEKIRQRLLEPLGFQCTFIEDFDCYLTEIGDFCACANIRRVPPFAFKWWRMVPEPQA  
>ENSCAFG00845003990/1-691  
-----MSFQSIHLSLSDSPVRLCVLGMELCLDVNGCTPERCEAFTISSSPGVSVDLHGTLPGTGQEGT  
AVTRWPLSNPTDVLVKMTCPSASDGDQVLVSYLPEDEDVPVATAVLRITGIVVSLDLDVDIRSGQVEIASDK  
QAKKNWWWGPGSWGAILLVNCS PADKQI-IDQKTKVFFPPEEIKSLSQMTLNVQGPGLTKKYRVLVHTSE  
EEARKARVYRQDRSSSTFEVLLGPGQCTYTFAP----LENNLKETFYVEAIEFPSADFSGLISYSVSLVEE  
PQDPSIPETLVYKDTVFRVAPCVFIPSTQMPLEVYLCRELQVQGFVNTVMELSEKSNQVAVSYEDPNRLG  
RWLQDEMAFCYTQAPHKTLVLDTPRVLTLDDFPMKYSLSPGVGYVIQCTKDRVASMDSIGNLMVSPPVK  
VEGKEYPLGRILIGSCFYPSKEGRDMGKALRDFLYAQRVQAPVELFSDWLMVGHMDEFMCFIPTQDKSEGEK  
GFRLLASPSACYRLFEEKQKEGYGDMALFEEVREDQLLSNGRQANTINQLLADKNMRKQNDYVEKINLNR  
DILKELGLVERDIIDIPQLFCLEQLTNVPSSEQTGKFFARPYFPDQLLQMIVMGKNLGIKPFPGPQIKGTCC  
LEEKICQLEPLGFKCTFIDDFDCYLTEIGDFCACANIRRVPPFAFKWWRMVPEPQA  
>ENSCAFG00020005177/1-691  
-----MSFQSIHLSLSDSPVRLCVLGMELCLDVNGCTPERCEAFTISSSPGVSVDLHGTLPGTGQEGT  
AVTRWPLSNPTDVLVKMTCPSASDGDQVLVSYLPEDEDVPVATAVLRITGIVVSLDLDVDIRSGQVEIASDK  
QAKKNWWWGPGSWGAILLVNCS PADKQI-IDQKTKVFFPPEEIKSLSQMTLNVQGPGLTKKYRVLVHTSE  
EEARKARVYRQDRSSSTFEVLLGPGQCTYTFAP----LENNLKETFYVEAIEFPSADFSGLISYSVSLVEE  
PQDPSIPETLVYKDTVFRVAPCVFIPSTQMPLEVYLCRELQVQGFVNTVMELSEKSNQVAVSYEDPNRLG  
RWLQDEMAFCYTQAPHKTLVLDTPRVLTLDDFPMKYSLSPGVGYVIQCTKDRVASMDSIGNLMVSPPVK  
VEGKEYPLGRILIGSCFYPSKEGRDMGKALRDFLYAQRVQAPVELFSDWLMVGHMDEFMCFIPTQDKSEGEK  
GFRLLASPSACYRLFEEKQKEGYGDMALFEEVREDQLLSNGRQANTINQLLADKNMRKQNDYVEKINLNR  
DILKELGLVERDIIDIPQLFCLEQLTNVPSSEQTGKFFARPYFPDQLLQMIVMGKNLGIKPFPGPQIKGTCC  
LEEKICQLEPLGFKCTFIDDFDCYLTEIGDFCACANIRRVPPFAFKWWRMVPEPQA  
>ENSVVUG00000029038/1-681  
-----MSFQSIHLSLSDSPVRLCVLGMELCLDVNGCAPEKCEAFTISSSPGVSVDLHSTLPGPGREGT  
TMTRWPLSNPTDVLVKMTCPSASDGDQV----YLPDLDLPIEGLWPTLLA-VVSLDLDVDIRSGQVEIASDK  
QAKKNWWWGPGSWGAILLVNCS PADKQI-IDQKTKVFFPPEEIKSLSQMTLNVQGPGLTKKYRVLVHTSE  
EEARKARVYRQDRSSSTFEVLLGPGQCTYTFAP----LENNLKETFYAEIEFPSADFSGLISYSVSLVEE  
PQDPSIPETLVYKDTVFRVAPCVFIPSTQMPLEVYLCRELQVQGFVNTVMELSEKSNQVAVSYEDPNRLG

RWLQDEMAFCYTQAPHKTLISLVDTPRVLTEDFPMKYSLVWG-----SCTKDHVRASMDSIGNLMVSPPVK  
VEGKEYPLGRILIGSCFYPSKEGRDMSKALRDFLYAQRVQAPVELFSDWLMVGHMDEFMCFIPTQDKSEGEK  
GFRLLLASPSSCYRLFEEKQKEGYGDMALFEVREDQLLSNGREANTINQLLADENMRKQNDYVEKCINLNR  
DILKKEGLVERDIIDIPQLFCLEQLTNVPSSEQTGKFFARPYFPDLLQMIVMGKNLGIKPFPGPQIKGTCC  
LEEKICQLEPLGFKCTFIDDFDCYLTEIGDFCACANIRRVPFPAFKWWRMVPEPQA

>ENSPPRG0000008467/1-691

-----MSFQSLVHLSLDGVPVHALCVLGVLDICLDLSCAPEKCKSFTISGSPGLVDIHNTSPLMTKEET  
ATTRWPLSDPMDVLVNMISPSSAPDGDKVLVSYLDPDEEVPVATAVLCCTGIVVSLDLDVIRSGQVEVASDK  
QAKKNWWWGPGSWGAILLVNCSPTDKGQS-MDKKTTRVFFPEEIKLSQMTLNVQGPSCTLKRYRLVHTSK  
EEAEKARVYRPQKDSSTFEVLLGPGQHTYAFAP----LENHLKETFYVEAVEFSPADFSGLISYSVSLVQE  
SPDPSIPETLVYKDTVFRVAPCVFIPSTQMPLEVYLRELQVEGFVNTMMELSEKSNSQVASVYEDPNRLG  
RWLQDEMAFCYTQAPHKTLISLVDTPRALTEDFPMKYSLSVPGVGYVIQCTQDHRVASMDSIGNLMVSPPVK  
VGGKEYPLGRILIGSCFYPSKEGRDMSKALRDFLYAQRVQAPVELFSDWLMVGHIDEFMCFIPTQDKSEGEK  
GFRLLLASPSSCYRLFEEKQREGYGDVTLFEEVRGDQLLSNGREANTIHQLLADENMRKQNEYVEKCINLNR  
DIVKKEGLAERDIIDIPQLFCLEQLTNVPSDQQTGKFYARPYFPDLLQMMVMGKNLGIKPFPGPQIKGTCC  
LEKICQLEPLGFQCTFIDDFDCYLTEVGDGFCACANIRRVPFPAFKWWRMVPEPQA

>ENSPLOG00000016269/1-691

-----MSFQSLVHLSLDGVPVHALCVLGVLDICLDLSCAPEKCKSFTIRGSPGLVDIHNTSPLMTKEET  
ATTRWPLSDPMDVLVNMISPSSAPDGDKVLVSYLDPDEEVPVATAVLCCTGIVVSLDLDVIRSGQVEVASDK  
QAKKNWWWGPGSWGAILLVNCSPTDKGQS-MDKKTTRVFFPEEIKLSQMTLNVQGPSCTLKRYRLVHTSK  
EEAEKARVYRPQKDSSTFEVLLGPGQHTYAFAP----LENHLKETFYVEAVEFSPADFSGLISYSVSLVQE  
SPDPSIPETLVYKDTVFRVAPCVFIPSTQMPLEVYLRELQVEGFVNTMMELSEKSNSQVASVYEDPNRLG  
RWLQDEMAFCYTQAPHKTLISLVDTPRALTEDFPMKYSLSVPGVGYVIQCTQDHRVASMDSIGNLMVSPPVK  
VGGKEYPLGRILIGSCFYPSKEGRDMSKALRDFLYAQRVQAPVELFSDWLMVGHIDEFMCFIPTQDKSEGEK  
GFRLLLASPSSCYRLFEEKQREGYGDVTLFEEVRGDQLLSNGREANTIHQLLADENMRKQNEYVEKCINLNR  
DIVKKEGLAERDIIDIPQLFCLEQLTNVPSDQQTGKFYARPYFPDLLQMMVMGKNLGIKPFPGPQIKGTCC  
LEKICQLEPLGFQCTFIDDFDCYLTEVGDGFCACANIRRVPFPAFKWWRMVPEPQA

>ENSPLOG00000014335/1-691

-----MSFQSLVHLSLDGVPVHALCVLGVLDICLDLSCAPEKCKSFTISGSPGLVDIHNTSPLMTKEET  
ATTRWPLSDPMDVLVNMISPSSAPDGDKVLVSYLDPDEEVPVATAVLCCTGIVVSLDLDVIRSGQVEVASDK  
QAKKNWWWGPGSWGAILLVNCSPTDKGQS-MDKKTTRVFFPEEIKLSQMTLNVQGPSCTLKRYRLVHTSK  
EEAEKARVYRPQKDSSTFEVLLGPGQHTYAFAP----LENYKETFYVEAAEFSPADFSGLISYSVSLVQE  
SPDPSIPETLVYKDTVFRVAPCVFIPSTQMPLEVYLRELQVEGFVNTVMELSEKSNSQVASVYEDPNRLG  
RWLQDEMAFCYTQAPHKTLISLVDTPRALTEDFPMKYSLSVPGVGYVIQCTQDHRVASMDSIGNLMVSPPVK  
VGGKEYPLGRILIGSCFYPSKEGRDMSKALRDFLYAQRVQAPVELFSDWLMVGHIDEFMCFIPTQDKSEGEK  
GFRLLLASPSSCYRLFEEKQREGYGDVTLFEEVRGDQLLSNGREANTIHQLLADENMRKQNEYVEKCINLNR  
DIVKKEGLAERDIIDIPQLFCLEQLMNVPSDQQTGKFYARPYFPDLLQMMVMGKNLGIKPFPGPQIKGTCC  
LEKICQLEPLGFQCTFIDDFDCYLTEVGDGFCACANIRRVPFPAFKWWRMVPEPQA

>ENSFACAG00000010186/1-691

-----MSFQSLVHLSLDGVPVHALCVLGVLDICLDLSCAPEKCKSFTISGSPGLVDIHNTSPLMTKEEM  
ATTRWPLSDPMDVLVNMISPSSAPDGDKVLVSYLDPDEEVPVATAVLCCTGIVVSLDLDVIRSGQVEVASDK  
QAKKNWWWGPGSWGAILLVNCSPTDKGQS-MDKKTTRVFFPEEIKLSQMTLNVQGPSCTLKRYRLVHTSK  
EEAEKARVYRPQKDSSTFEVLLGPGQHTYAFAP----LENYKETFYVEAAEFSPADFSGLISYSVSLVQE  
SPDPSIPETLVYKDTVFRVAPCVFIPSTQMPLEVYLRELQVQGFVNTVMELSEKSNSQVASVYEDPNRLG  
RWLQDEMAFCYTQAPHKTLISLVDTPRALTEDFPMKYSLSVPGVGYVIQCTQDHRVASMDSIGNLMVSPPVK  
VGGKEYPLGRVLIIGSCFYPSKEGRDMSKALRDFLYAQRVQAPVELFSDWLMVGHIDEFMCFIPTQDKSEGEK  
GFRLLLASPSSCYRLFEEKQREGYGDVTLFEEVRGDQLLSNGREANTIHQLLADENMRKQNEYVEKCINLNR  
DIVKKEGLAERDIIDIPQLFCLEQLMNVPSDQQTGKFFARPYFPDLLQMMVMGKNLGIKPFPGPQIKGTCC  
LEKICQLEPLGFQCTFIDDFDCYLTEVGDGFCACANIRRVPFPAFKWWRMVPEPQA

>ENSEASG0000005015759/1-687

-----MSFQSIHLSLDSPVHALCVLGMIEYLDLRSCAPQKCKSFTVSSSLGVLVDVHNSVPVMTREEV  
ATTLWPLSDSMDVLVNMISPSSAIDGDKVLVSYHQDDEEVPVATATLYLTGIAVSLDLDVYRRGQVEMASDN  
RAKKNWWWGPGSWGAILLVNCSPADMGQL-TDRNTTKAFFPEEMKNLSQMTLSVQGPNCILKXHLVHTSE  
DEAQRARVYQPKDGSSTLELVGPGRHTYTLPP----LESPLKETFYVEAVEFSPADFSGLIAYSVCLVEE  
PPDPSIPETLVYKDTVFRVAPCVFIPSTQMPLEVYLRELQVQGFVNTVMELSEKSNSQVASVYEDPSRLG  
RWLQDEMAFCYTQAPHKTLISLVDTPRVLKLEDFPMKYSLSVAVGYRIQRTEHRVASMDSIGNLTVSPPVK  
VGGKEYPLGRILIGSSFYPSKEGRDMGKALRDFLYAQQVQAPVELFSDWLMVGHIDEFMCFIPTQDKREGDK  
GFRLLLASPSSCYRLFQEKQKEGYGDMHLFEGVRADQLLSNGREANTIHQLLADENMRRQNDYVQKICINLNR  
DVLKAEGLAERDIIDIPQLFCLEQLTNAPSQQTGKLFARPYFPNLLQTIVMGKNLGIKPFPGPQIKGTCC  
LEEKICQLEPLGFQCTFIDDFDCYLTEIGDFRACANVRRVPFPAFKWWRMVPEPQA

>ENSCDRG0000005005429/1-695

VVSLLEGAMSFRLVHLSLDSPAHAICVVGMEICLDLSCAPPSCESFTISGSLGVLVDIHNTVPGKAKEEA  
AMARWPLSHPVLDVLVNMISPSSAINEEKILVSYQCNEKVPVATALLYLTGIEISLDLDVIRSGHVEMASDK

QAKKNWWWGPGSWGAILLVNCSPADMGQL-VDKKSNGVLFMEEIKGLSQMTLKVEGSPCVLKKYRLVLHTSK  
EESEKARVYRPKKDSSSSSFELVLPDWHYTFAP----LEKNLMEFYIEAVEFPPSASFGLISYSVSLVEE  
SQDLLIPETLLYKDTVFRVAPCIFIPTTQMPLLEVYLCRELQVQGFVNTVLLSERSNSQVASVYEDPNRLG  
RWLQDEMAFCYTQAPHKTVSLVLDTPRALKLEDFPMKYSLSPGIGYIIQRTKDRHVASMDSIGNLMVSPPVK  
VEGKEYPLGRILIGSSFYPSKEGRDMSKALRDFLYAQVQVAPVELFSDWLMAGHICEFMCFIPAQYKQEGRK  
DFRLLLASPSSCYKLFKEKQKEGYGDMPLFEEVRKQDLISNGREASTINQLLADENMRKQNDYVENCINLNR  
DILKRELGLVEKDIIDIPQLFCLEQLTNVPSSEQTQKLFARPYFPDLLQIIVMGTNLGIKPFGRINGTCC  
LEEKVCQLEPLGFQCTFIDDFDCYLTEIGDFCSCANIRRVPPFAFKWWRMVP----

>ENSRFEG00010015258/1-693

-VSLEGRAMSFQSLIHLSDLNPERAHCIVGTEICLDLSCAPQKCKFFTISGSPGVFVNIHNTGPVITSEEA  
AVNRWLSLSDPMDVLVKMTSPSTVIDEEKVLVSYYQPDEEVPVATAELYLTGVAVSLDVPDIYRNGQVEMANNK  
QAKKNWWWGPKGWGAILLVNCSPTDMGQL-IDKKTTRVIFSEEIKLSQMTLNVQGPSCILKNHQLVLYTSE  
EESEKTRVYRPQEDGSSSTFELVLPGRHTYTFAP----LESHLKETFYVEALEFPPSADFFGLISYSVSLVEE  
SQDPSIPETLVYKDTVFRVAPCIFTPTTQMPLLEVYLCRELQVQGFVSAVVELSEKSNSQVASVYEDPSRLG  
RWLQDEMAFCYTQAPHKTVSLVLDTPRVLKLEDFPMKYSLSPGVGYMIQCTKDRHVASMDSIGNLMVSPPVK  
VEGKEYPLGRILFGSSFYPSKEGRAMSKALRDFLYAQVQVAPVELFSDWLMTGHVDEFMCFIPTHDKSEGKK  
-FRLLLASPACYKLFQEKQKEGYGDMPLFEEVREDQLLSNGREANTINQLLADENMRKQDAYVEKCVNLNR  
DILKRELGLVEKDIIDIPQLFCLEQLTNVPSSEQTQKLYARPYFPDLLQVIVMGKNLGIKPFQKIGTCC  
LEEKICQLEPLGFQCTFINDFDCYLTEIGDFCACANIRRVPPFAFKWWRMVP----

>ENSDLEG00000017509/1-676

MGDLEGRAMSFQSTVHLSLSDSPAHAICVQGMEIYLDVNGCAPQQCESFTVDSSPGVVVQIYGTDPVKIGEEA  
AMNWWWPLSHPTNVLVGMTSPSSANDKKGKVSYSYYQHNEVDPMATAVLYLTSIGAL-----  
--PKNWWWGPKGWGAILLVNCSPADAHQL-VD-RKSKVFSTEETKLSQMLRVQGPSYILKKCRVVLHTSK  
EESEKARVYRPQKDSSTFELVLPDQHTYNLAP----VEDDLEETFYVEALEFPPSASFGLISYSASLVEE  
SQDLSIPETVYKDTVFRVAPCVFVSSTQMPLLEVYLCRELQVQGFVNTVMELSESNIQVASVYEDPNRLG  
RWLQDEMAFCYTQAPHKTVSLVLDTPRPLKLDLDFPMKYSLSPGVGYMTQRTQDHTVASIDSIGNLMVSPPVK  
AQQKEYPLGRILIGSSFYPSKDCRNLSKTLRDFLYAQVQVAPVELFSDWLMIGHAYEFMCFIPAQYKVEDKK  
DFWLLLASPSSCYKLFKEKQKEGYGDARLFEGIRKQDLISNGREANTINQLLADENMRKQDAYVEKCVNLNR  
SILKRELGLVEEQDIIDIPQLFCLEHIANIPSSSEQTEKLYARPYFPDLLQMVVMGQNLGIKPFQKINGACC  
LEEKIRQLEPLGFQCTFVNDFDCYLTEIGDFCSCANIRRVPPFAFKWWRMVP----

>ENSDLEG00000017924/1-676

MGDLEGRAMSFQSTVHLSLSDSPAHAICVQGMEIYLDVNGCAPQQCESFTVDSSPGVVVQIYGTDPVKIGEEA  
AMNWWWPLSHPTNVLVGMTSPSSANDKKGKVSYSYYQHNEVDPMATAVLYLTSIGAL-----  
--PKNWWWGPKGWGAILLVNCSPADAHQL-VD-RKSKVFSTEETKLSQMLRVQGPSYILKKCRVVLHTSK  
EESEKARVYRPQKDSSTFELVLPDQHTYNLAP----VEDDLEETFYVEALEFPPSASFGLISYSASLVEE  
SQDLSIPETVYKDTVFRVAPCVFVSSTQMPLLEVYLCRELQVQGFVNTVMELSESNIQVASVYEDPNRLG  
RWLQDEMAFCYTQAPHKTVSLVLDTPRPLKLDLDFPMKYSLSPGVGYMTQRTQDHTVASIDSIGNLMVSPPVK  
AQQKEYPLGRILIGSSFYPSKDCRNLSKTLRDFLYAQVQVAPVELFSDWLMIGHAYEFMCFIPAQYKVEDKK  
DFWLLLASPSSCYKLFKEKQKEGYGDARLFEGIRKQDLISNGREANTINQLLADENMRKQDAYVEKCVNLNR  
SILKRELGLVEEQDIIDIPQLFCLEHIANIPSSSEQTEKLYARPYFPDLLQMVVMGQNLGIKPFQKINGACC  
LEEKIRQLEPLGFQCTFVNDFDCYLTEIGDFCSCANIRRVPPFAFKWWRMVP----

>ENSDLEG00000009237/1-676

MGDLEGRAMSFQSTVHLSLSDSPAHAICVQGMEIYLDVNGCAPQQCESFTVDSSPGVVVQIYGTDPVKIGEEA  
AMNWWWPLSHPTNVLVGMTSPSSANDKKGKVSYSYYQHNEVDPMATAVLYLTSIGAL-----  
--PKNWWWGPKGWGAILLVNCSPADAHQL-VD-RKSKVFSTEETKLSQMLRVQGPSYILKKCRVVLHTSK  
EESEKARVYRPQKDSSTFELVLPDQHTYNLAP----VEDDLEETFYVEALEFPPSASFGLISYSASLVEE  
SQDLSIPETVYKDTVFRVAPCVFVSSTQMPLLEVYLCRELQVQGFVNTVMELSESNIQVASVYEDPNRLG  
RWLQDEMAFCYTQAPHKTVSLVLDTPRPLKLDLDFPMKYSLSPGVGYMTQRTQDHTVASIDSIGNLMVSPPVK  
AQQKEYPLGRILIGSSFYPSKDCRNLSKTLRDFLYAQVQVAPVELFSDWLMIGHAYEFMCFIPAQYKVEDKK  
DFWLLLASPSSCYKLFKEKQKEGYGDARLFEGIRKQDLISNGREANTINQLLADENMRKQDAYVEKCVNLNR  
SILKRELGLVEEQDIIDIPQLFCLEHIANIPSSSEQTEKLYARPYFPDLLQMVVMGQNLGIKPFQKINGACC  
LEEKIRQLEPLGFQCTFVNDFDCYLTEIGDFCSCANIRRVPPFAFKWWRMVP----

>ENSMNMG00015008836/1-680

MGDLEGRAMSFQSTVHLSLSDSPAHAICVQGEIYLDVNGCAPQQCESFTVDSSPGVVVQIYGTDPVKIGEEA  
AMNWWWPLSHPMNVLVGMTSPSSDPD----TSLRQ----PW--VLTYSKKAASLDVDYRSGHFE-TNDK  
QAKKNWWWGPKGWGAILLVNCSPADAHQL-VD-RKSKVFSTEETKLSQMLRVQGPSCILKKCRVVLHTSK  
EESEKARVYRPQKDSSTFELVLPDQHTYNLAP----VEDDLEETFYVEALEFPPSASFGLISYSASLVEE  
SQDLSIPETVYKDTVFRVAPCVFVSSTQMPLLEVYLCRELQVQGFVNTVMELSESNIQVASVYEDPNRLG  
RWLQDEMAFCYTQAPHKTVSLVLDTPRPLKLDLDFPMKYSLSPGVGYMTQRTQDHTVASIDSIGNLMVSPPVK  
AQQKEYPLGRILIGSSFYPSKDCRNLSKTLRDFLYAQVQVAPVELFSDWLMIGHAYEFMCFIPAQYKVEDKK  
DFWLLLASPSSCYKLFKEKQKEGYGDARLFEGIRKQDLISNGREANTINQLLADENMRKQDAYVEKCIDLNR  
SILKRELGLVEEQDIIDIPQLFCLEHIANIPSSSEQTEKLYARPYFPDLLQMVVMGQNLGIKPFQKINGACC  
LEEKIRQLEPLGFQCTFINDFDCYLTEIGDFCSCANIRRVPPFAFKWWRMVP----

>ENSPSNG0000000724/1-676

MGDLEGRAMSFQSTVHLSLESPAHAICVQGMEIYLDVNGCAPQQCESFTVDSSPGVWVQIYGTDPVKIGEEA  
AMNWWPLSRPTNVLVGMTSPSSANDKGKVSYSYQHNEVDPMATAVLYLTSIGESL-----  
--QKNWVWGPKGWGAILLVNCCPADAHQL-VD-RKSKVFSTEETKSLSQMILRVQGPSCILKKCRVVLHTSK  
EESKARVYRPQKDCSSTFELVLGPDQHTYNLAP----VEDDLEETFYVEALEFSPASFSGLISYSASLVEE  
SQDLSIPETVVYKDTVFRVAPCVFVSSTQMPLEVYLCRELQVQGFVNTVMELSESNIQVASVYEDPNRLG  
RWLQDEMAFCYTQAPHKTIISLVLDTPRLPKLDDFPMKYSLSPGVGYMTQRTQDHTVASIDSIGNLMVSPPVK  
AQQKEYPLGRILIGSSFYPSKDCRNLSKTLRDFLYAQVQAPVELFSDWLMIGHAYEFMCFIPAQYKVEDKK  
DFWLLASPSSCYKLFKEKQKEGYGDARLFEGIRKQDQLLSNGREANTINQLLADENMRKQNAIVEKCIDLNR  
SILKRELGLEEQDIIDIPQLFCLHEIANIPSSQTEKLYARPYFPDLLQMVMGQNLGIPKPFPGPQINGACC  
LEEKIRQLLEPLGFQCTFINDFDCYLTEIGDFCSCANIRRVVPAFAKWWRMVP----

>ENSPCTG00005022042/1-643

MGDLEGRAMSFQSIHVHLSLDSPAHAICVQGVIEYLDVNGCAPQQCESFTVDSSPGVWVQIYGTDPVKIGEEA  
AMNWWPLSHPTNVLVGMTSPSSANDKGKVSYSYQHNEVDPMATAVLYLTSIGESL-----  
--QKNWVWGPKGWGAILLVNCSPADATHQL-VD-RKSKVFSTEETKSLSQMMLRVQGPSCILKKCRVVLHTSK  
EESKARVYRPQKDCSSTFELVLGPDQHTYNLAP----VGDDLEETFYVEALEFSPASFSGLISYSASLVEE  
SQDLSIPETVVYKDTVFRVAPCVFVPSTQ-----ILPGPGRFC  
NWLQDEMAFCYTQAPHKTIISLVLDTPRLPKLDDFPMKYSLSPGVGYMTQRTQDHAVASIDSIGNLMVSPPVK  
AQQKEYPLGRILIGSSFYPSKDCRNLSKTLRDFLYAQVQAPVELFSDWLMIGHAYEFMCFIPAQYKVEDEK  
GFRLLASPSSCYKLFKEKQKEGYGDARLFEGIRKQDQLLSNGREANTINQLLADENMRKQNSYVEKCIDLNR  
NILKRELGLEEQDIIDIPQLFCLHEIANIPSSQTEKLYARPYFPDLLQMVMGQNLGIPKPFPGPQINGTCC  
LEEKIRQLLEPLGVQCTFINDFDCYLTEIGDFCSCANIRRVVPAFAKWWRMVP----

>ENSBMSG00010001172/1-676

MGSPGSRAMSFQSIHVHLSLDSPAHAICVQDMEIYLDVNGCAPQQCKSFTVDSSPGVWVQIYGTDPVKIGEEA  
AMNRWPLSHPTNVLVGMASPSANDKGKVSYSYQHSEVDPMATAVLYLTSIGESL-----  
--QKNWVWGPKGWGAILLVNCSPADAHQL-VG-RKSKVFSTEETKSLSQMILRVQGPSCILKKCRVVLHTSK  
EESKARVYRPQKDCSSTFELVLGPDQHTYNLAP----VEDDLEETFYVEALEFSPASFSGLISYSASLVGE  
SPDPSIPETVVYKDTVFRVAPCVFVPSTQMPLEVYLCRELQVQGFVNTVMELSESNIQVASVYEDPNRLG  
RWLQDEMAFCYTQAPHKTIISLVLDTPRLPKLDDFPMKYSLSPGVGYMTQRTQDHTVASIDSIGNLMVSPPVK  
AQQKEYPLGRILIGSSFYPSKDCRNLSKTLRDFLYAQVQAPVELFSDWLMIGHAYEFMCFIPAQYKVEDKK  
DFRLLASPSSCYKLFKEKQKEGYGDARLFEGIRKQDQLLSNGREANTINQLLADENMRKQNDYAEKCIDLNR  
SILKRELGLEEQDIIDIPQLFCLERIANIPSSQTEKLYARPYFPDLLQMVMGQNLGIPKPFPGPQINGTCC  
LEEKIRQLLEPLGFQCTFINDFDCYLTEIGDFCSCANIRRVVPAFAKWWRMVP----

>ENSOARG00020012854/1-688

-----MAFRNIVPLSLDSPHVAVCVLGVELFLDVSGCAPPACESFSVDASLGWVVRVCGADPVESREGP  
AAPRWPLSRPTDVLVAMTSPNFAEDEGKVLVYHQPKEDTPVATAVHLTGVLSLDVDIYRSGHFE-ATDK  
QAKRTWWVWGPGGWGAILLVSCSPSAAGQP-GD--KNKVFSSSEEVKSLSQMVLKVQGPSCITKNYRVVLHTSK  
EESKARVYRPQNDGSTAFELVLGPDQHTYTLAPQWDDRGTGTLKETFYVEALEFSPASFSGLISFSASLVEE  
SQDPLVPETVLYKDTVFRVAPCIFAFTTQMPLEVYLCRELQVQGFVSAVTELSERSNSQVASVYEDPNRLG  
RWLQDEMAFCYTQAPHKTVSLVLDTPRVAKPDDFPMKYSLSPGVGYLTLRTQDHTVASIDIIGKLMVSPPVK  
AQQKEYPLGRVILIGSSFYPSKDSRNMSQSLQDFLRAQQVQAPVELFSDWLMTGHACEFMCFIPTQYKVEGKK  
DFRLLASPSSCYKLFKERQKEGYGDAMLFEGRLKQDQLISNGREAVTINQLLADEKMRKHNDYAEKCIHLNR  
SILKRELGLQEEDIPIPIQLFCLHEIANAPPSEQTKRLYARPYFPDLLQMVMGMLNLGIPKPFGRVSGACC  
LEERVQQLLEPLGFQCTFIDDFDCYLTEIGDFCSCASIRRVVPAFAKWWGMVP----

>ENSCHIG00000014830/1-688

-----MAFRNIVPLSLDSPHVAVCVLGVELFLDISGCAPPACESFSVDASLGWVVRVCGADPVESREGP  
AAPRWPLSCPTDVLVAMTSPNFAEDEGKVLVYHQPKEDTPVATAVHLTGVLSLDVDIYRSGRFE-ATDK  
QAKKTWWVWGPGGRGAILLVNCSVAGQP-VD--KNKVFSSSEEVKSLSQMVLKVQGPSCITKNYRVVLHTSK  
EESKARVYRPQNDGSTAFELVLGPDQHTYTLAPQWDDRGTGTLKETFYVEALEFSPASFSGLISFSASLVEE  
SQDPLVPETVLYKDTVFRVAPCIFAFTTQMPLEVYLCRELQVQGFVSAVTELSERSNSQVASVYEDPNRLG  
RWLQDEMAFCYTQAPHKTVSLVLDTPRVAKPDDFPMKYSLSPGVGYLTLRTQDHTVASIDIIGKLMVSPPVK  
AQQKEYPLGRVILIGSSFYPSKDSRNMSQSLQDFLRAQQVQAPVELFSDWLMTGHACEFMCFIPMQYKVEGKK  
DFRLLASPSSCYKLLKERQKEGYGDAMLFEGRLKQDQLISNGREAVTINQLLADEKMRKHNDYAEKCIHLNR  
SILKRELGLQEEDIPIPIQLFCLHEIANAPPSEQTKRLYARPYFPDLLQMVMGMLNLGIPKPFGRVSGACC  
LEERVQQLLEPLGFQCTFIDDFDCYLTEIGDFCSCASIRRVVPAFAKWWGMVP----

>ENSBIXG00005026457/1-695

-VSPEGCAMAFRNIVPLSLDSPHVAVCVLGMEIFLDISGCAPPACESFSVDASLGWVVRVCGADPVESREKS  
AAPRWPLSRPTDVLVAMTSPNFAEDEGKVMIFYHQPKEDAPMATAVHLTGIELSLDVIYRSGRFE-AADK  
QAKKTWWVWGPGGWGAILLVNCSVSGQP-VN--KSKVFSSEEVKSLSQMVLKVQGPSCITKNYRVVLHTSK  
EESKARVYRPQNDGSMTEFELIGPEQHAYTLAPQWDEVKGTLRETFYVEALEFSPASFSGLISFSASLVEE  
SQDPLVPEAVLCKDVTFLRVAPCIVFPSTQMPLEVYLCRELQVQGFVSTVTELSERSNSQVASVYEDPNRLG  
RWLQDEMAFCYTQAPHKTVSLVLDTPRVAKLDDFPMKYSLSPGVGYLTLHAQDHTVASIDVIGKLMVSPPVK  
AQQREYPLGRVILIGSSFYPSKDSRNMSRSLQDFLRAQQVQAPVELFSDWLMTGHACEFMRFIPAQYKVEGKK

DFRLLASPSSCYKLFKERQKEGYGDAMLFEGLRKQDQLSNGREAITINQLLADEKMRKQNDYAEKCIHLNR  
GILKRELGLQEEDIIPVPQQLFCLEHIANAPPSEQTKKLYARPYFPDLLEMVVMGLNLGIPKPFGRINGTCC  
LEERICQLEPLGFQCTFIDDFDCYLTEIGDFCSCANIRRVVPAFAKWWGMV----

>ENSBTAG00000038945/1-688

-----MAFRNIVPLSLDSPHAVCVLGMEIFLDISGCAPRACESFSVDASLGVVVRVCGADPVESREKS  
AAPRWPLSRPTDVLVAMTSPNFAEDEGKVMIFYHQPEDAPMATAVLHHTGIELSLDVIYRSGRFE-AADK  
QAKKTWWVWPGGGWGAILLVNCSPSVSGQP-VD--KSKVFSSEEVKLSQMVLVKQVGPSCITKNYRVVLTHTSK  
EESEKARVYRPQNDGSMTEFELILGPEQHAYTLAPQWDEVKGTLETFYVEALEFPPSASFGLISFSASLVEE  
SQDPLVPEAVLCKDVTFLFRVAPCIVFPSTQMPLEVLVLCRELQVQGFVSTVTELSERSNSQVASVYEDPNRLG  
RWLQDEMAFCYQAPHKTVSLVLDTPRVAKLDDFFPMKYSLSPGVGYLTLHTQDHTVASIDVVGKLMVSPVVK  
AQGREYPLGRVLIGSSFYPSKDSRNVSRLQDFLRAQQVQAPVELFSDWLMTGHACEFMRFIPAQYKVEGKK  
DFRLLASPSSCYKLFKERQKEGYGDAMLFEGLRKQDQLSNGREAITINQLLADEKMRKQNDYAEKCIHLNR  
GILKRELGLQEEDIIPVPQQLFCLEHIANAPPSEQTKKLYARPYFPDLLEMVVMGLNLGIPKPFGRINGTCC  
LEERICQLEPLGFQCTFIDDFDCYLTEIGDFCSCANIRRVVPAFAKWWGMV----

>ENSBMUG0000003419/1-695

-VSPEGCAMAFRNIVPLSLDSPHAVCVLGMEIFLDISGCAPRACESFSVDASLGVVVRVCGADPVESREKS  
AAPRWPLSRPTDVLVAMTSPNFAEDEGKVMIFYHQPEDAPMATAVLHHTGIELSLDVIYRSGRFE-AADK  
QAKKTWWVWPGGGWGAILLVNCSPSVSGQP-MD--KSKVFSSEEVKLSQMVLVKQVGPSCITKNYRVVLTHTSK  
EESEKARVYRPQNDGSMTEFELILGPEQHAYTLAPQWDDVKGTLETFYVEALEFPPSASFGLISFSASLVEE  
PQDPLVPEAVLCKDVTFLFRVAPCIVFPSTQMPLEVLVLCRELQVQGFVSTVTELSERSNSQVASVYEDPNRLG  
RWLQDEMAFCYQAPHKTVSLVLDTPRVAKLDDFFPMKYSLSPGVGYLTLHTQDHTVASIDVIGKLMVSPVVK  
AQGREYPLGRVLIGSSFYPSKDSRNMSRLQDFLRAQQVQAPVELFSDWLMTGHACEFMRFIPAQYKVEGKK  
DFRLLASPSSCYKLFKERQKEGYGDAMLFEGLRKQDQLSNGREAITINQLLADEKMRKQNDYAEKCIHLNR  
GILKRELGLQEEDIIPVPQQLFCLEHIANAPPSEQTKKLYARPYFPDLLEMVVMGLNLGIPKPFGRINGTCC  
LEERICQLEPLGFQCTFIDDFDCYLTEIGDFCSCANIRRVVPAFAKWWGMV----

>ENSBGRG0000003075/1-635

-----MSLESLMP-----SNHLIL-----CRP-----LLLLPSIFSSIRVFSNESA  
LHIRWPKFWSFNFSISLSNESFRMDTLKSLQHSSKASIQTIRTV-----FLS-----  
SLQKTWWVWPGGGWGAILLVNCSPSVSGQP-VD--KSKVFSSE---SLSQMVLVKQVGPSCITKNYRVVLTHTSK  
EESEKARVYRPQNDGSMTEFELILGPEQHAYTLAPQWDDVKGTLETFYVEALEFPPSASFGLISFSASLVEE  
PQDPLVPEAVLCKDVTFLFRVAPCIVFPSTQMPLEVLVLCRELQVQGFVSTVTELSERSNSQVASVYEDPNRLG  
RWLQDEMAFCYQAPHKTVSLVLDTPRVAKLDDFFPMKYSLSPGVGYLTLHTQDHTVASIDVIGKLMVSPVVK  
AQGREYPLGRVLIGSSFYPSKDSRNMSRLQDFLRAQQVQAPVELFSDWLMTGHACEFMRFIPAQYKVEGKK  
DFRLLASPSSCYKLFKERQKEGYGDAMLFEGLRKQDQLSNGREAITINQLLADEKMRKQNDYAEKCIHLNR  
GILKRELGLQEEDIIPVPQQLFCLEHIANAPPSEQTKKLYARPYFPDLLEMVVMGLNLGIPKPFGRINGTCC  
LEERICQLEPLGFQCTFIDDFDCYLTEIGDFCSCANIRRVVPAFAKWWGMV----

>ENSBGRG00000020369/1-672

-----MYKDL-----HA--VLGMEIFLDISGCAPRACESFSVDASLGVVVRVCGADPVESREKS  
AAPRWPLSRPTDVLVAMTSPNFAEDEGKVLIFYHQPEDAPMATAVLHHTGIELSLDVIYRSGRFE-AADK  
QAKKTWWVWPGGGWGAILLVNCSPSVSGQP-VD--KSKVFSSEEVKLSQMVLVKQVGPSCITKNYRVVLTHTSK  
EESEKARVYRPQNDGSMTEFELILGPEQHAYTLAPQWDDVKGTLETFYVEALEFPPSASFGLISFSASLVEE  
SQDPLVPEAVLCKDVTFLFRVAPCIVFPSTQMPLEVLVLCRELQVQGFVSTVTELSERSNSQVASVYEDPNRLG  
RWLQDEMAFCYQAPHKTVSLVLDTPRVAKLDDFFPMKYSLSPGVGYLTLHTQDHTVASIDVVGKLMVSPVVK  
AQGREYPLGRVLIGSSFYPSKDSRNMSRLQDFLRAQQVQAPVELFSDWLMTGHACEFMRFIPAQY-----K  
DFRLLASPSSCYKLFKERQKEGYGDAMLFEGLRKQDQLSNGRKAITINQLLADEKMRKQNDYAEKCIHLNR  
GILKRELGLQEEDIIPVPQQLFCLEHIANAPPSEQTKKLYARPYFPDLLEMVVMGLNLGIPKPFGRINGTCC  
LEERICQLEPLGFQCTFIDDFDCYLTEIGDFCSCANIRRVVPAFAKWWGMV----

>ENSMMSG00000007431/1-687

VVSLEVRAMAFRNVPLSLDSPHAVCVLGMEIFLDVSGCAPRACESFSVDASLGVEVRICGAAPVESREEP  
AATRWPLSRPTNVLVAMTSPNFAKDEGKVLIFYHQPEDAPMATAVLHHTGIGECLPEPVFLS-----  
SLQRTWWVWPGGGWGAILLVNCSPSVAGQP-MD--QSKVFSSE-EVKLSQMVLVKQVGPSCVIRNCRVTLHTSK  
EESEKARVYRPQNDGSMTEFELVLPDRHTYTLAPQWDDVKDTLKETFYVEALEFPPSASFGLISFSASLVEE  
SQDPLVPETVLYKDTVFLFRVAPCIVFPSTQMPLEVLVLCRELQVQGFVSTVTELSERSNSQVASVYEDPNRLG  
RWLQDEMAFCYQAPHKTVSLVLDTPRVAKLDDFFPMKYSLSPGVGYLTLHTQDHTVASIDVIGKLMVSPVVK  
AQGREYPLGRVLIGSSFYPSKDSRNMSRLQDFLRAQQVQAPVELFSDWLMTGHACEFMRFIPAQY-----K  
DFRLLASPSSCYKLFKERQKEGYGDVMLFEGLRKQDQLSNGRKAITINQLLADEKMRKQNDYAEKCIHLNR  
SILKKELGLQEEDIIPVPQQLFCLEHIANAPPSEQTEKLYARPYFPDLVVMVVMGLNLGIPKPFGRINGTCC  
LEERICQLEPLGFQCTFIDDFDCYLTEIGDFCSCANIRRVVPAFAKWWGMV----

>ENSBHYG00000003136/1-695

-ASLEGRAMPFRNVPLSLDRPAHAVCVLGMEIFLDVSGCAPRACESFSVDASLGVVVRVCSAAPVESKEEP  
AATRWPLSSPKNVLVAMTSPNFAEDEGKVLIFYHQPEDAPMATAVLHHTGIELSLDVIYRSGRFE-TSDR  
QAKKTWWVWPGSGWGAILLVNCSPSVAGQP-VD--KSKVFSSEEVKLSQMVLVKQVGPSCITKNYRVVLTHTSK  
EESEKARVYRPQNDGSMTEFELVLPDRHTYTLAPQWDDVKDALKETFYVEALEFPPSASFGLISFSASLVEE

SQDPLVPETVLYKDSVLFVRVAPCIVFPSTQMPLEVVYLCRELQVQGFVSTVTELSERSNSQVASVYEDPNRLG  
RWLQDEMAFCYQAPHKTVSLVLDTPRVAKLDDFPMYSLSPGVGYLTLRTQDHTVASIDAAGKLMVSPPVK  
AQQKEYPLGRVLFSSFYPSKDSRNMNRDLRDLRAQQVQAPVELFSDWLMTHGACFMCFIPTQYKVEGKK  
DFRLLASPSSCYKLFKEKQKEGYGDATLFEGLRDKQLLSNGREPVTINQLLADEKMRKQNDYVEKCIHLNR  
SILKRELGLQEEDVIPIQLFCLERVTNAPSSEQTEKLYARPYFPDLLQMVVMGLNLGIPKPFPGPRVNGTCC  
LEERVCRLEPLGFQCTFIDDFDCYLTEIGDFCSCANIRRVVFAFKWWWGMVP----

>ENSCWAG00000005012/1-695

AVSIEALAMSFQSVIHLSDSPVHTVCLVMEICLDLSCAPQKCESFTISGSPGVLDIYNIAPGKARQEA  
ALTRWPLSHPMVDLVKMTSPSSVNGDKVLVSYFLPDEEVPVATAILYLTGIEVSLDVIYRNGDVEMASDK  
HAKKNWWWGPDGWGAILLVNCTPADPGQL-KDGKSTKVFSTEEMKNLSQMVLRVQGPSSILKHKHRLVLTHTSK  
DESDKARVYWPQKGSSTFKLVLPQGHYSYSLG----LENELKETFYVEALEFSPGSGFGLISFSASLVEE  
PQDLAIPETLAYKDTVFRVAPCIVFPSTQMPLEVVYLCRELQVQGFVNAVTELSERSNSQVASVYEDPNRLG  
RWLQDEMAFCYQAPHKTVSLVLDTPRVTKLDDFPMRYSLSPGVGYATQHTLDHTVASIDSVGNLVSPPVQ  
VEGKEYPLGRILIGSSCYPSKDGDRDMSKALRDFLYAQVQAPVELFSDWLMIGHYEFMCFVPTQFKVEGKK  
DFRLLASPSTCYKLFMEKQKQGYGDAALFGEVRKEQLLANGREAFINRLLADENMKKQNDYVERCISLNR  
AILKRELGLAEKDIIDIPQLFCLLEQLVNVPSNELTGKLYARPYFPDLLQIIVMGQNLGIPKPFPGPQINGTCC  
LEEKIYELLEPLGFQCTFINDFDCYLTEIGDFCSCANIRRVVFAFKWWWKMP----

>ENSSSCG00000003484/1-687

-----MSFQSIHLSDSPVHSTCMLGMEICLDLSCAPQKCESFTIASSPGVLVDIYNVASGKVTQEA  
ALTQWPLSHPMVDLVKMTSPSSDVNGDKVLVSYFLPHEDVPVATAILYLTGIEVSLDVIYRNGDVEMANDK  
QAKKNWWWGPDGWGAILLVNCTALNRGQI-KDGKITKVFSAEDIRNLSMVLRVQGPSCILKHKHRLVLTHTSK  
EESDKARVYRPQKDSSTFELVLGPGQHAYALGP----LESDLKETFYVEALQFSPGSGFGLISYSVSLVEE  
SKDGIQVQILVYKDTVFRVAPCIVFPSTQMPLEMYVCRELQVQGFVNAVTELSERSNSQVASVYEDPNRLG  
RWLQDEMAFCYQAPHKTTALVLDTPRVTKLEDFFPMRYSLSPGIGYVTLNLDHTVASIDSVGNLVSPPVK  
VKGKEYPLGRILIGSSFYPSKDGDRDMSKALRDFLYAQVQAPVELFSDWLMIGHYEFMCFIPTQFKVEGKK  
DFRLLASPSTCYKLFTEKQKQGYGDAALFGEIRKEQLLSNGREALTINQLLADENMKKQNDYVERCIDLNR  
AILKRELGLAEKDIIDIPQLFCLLEQIVNVPSNELTGKLYARPYFPNLLQIIVMGQNLGIPKPFPGPQINGACC  
LEEKIYELLEPLGFQCTFINDFDCYLTEIGDFCSCANIRRVVFAFKWWWKMP----

>ENSMUG00000014390/1-656

-----NR-----CAPSKCTSFTISSPRILLNLSHLVPAVTNKEG  
ASTRLLCEPMDVLVMMVFPSSDISEDKVSYSYQPDVQVVPVATAELFTGIEVSLDVIYRSGQVQVASK  
WAKKNWAWGPGSWGAILLVNCTPDGKAQD-GD--KTKVFLPEIINNLSMMLSVQGPCTFLKTCRLVLTYSK  
EEAKKARVYRPQDHSDDTDFDLVLPQGHYTFPP----LESSLKETFYVEATEFSPASFSGLISYSVALVEE  
SENTLIPETLMHKDMVFRVAPCIVFPSTQMPLEIYLCRELQVQGFVKTVELSEKSKSQVASVYEDPNRLG  
RWLQDEMAFCYQAPYKTIISLVDTPRVSNLEEFPMKYSLSPGIGYVTRPTEDGKVITMDSIGNLMSPPVE  
VKGKEYPLGRILIGSSFYPSKEARDMRKDLRDFLYAQVQAPVELYSDWLMIGHMDQFMCFVPTQVKGEGDK  
GFRLLASPRSCYQLFQEKQEEGYGDMALFEVREDQLLSNGREATINQLLDDDDMRKQNDYVEKCIHLNR  
DILKRELGLLERDIIHIPQLFCLQLSNVPATEQTEKLYARPYFPNLLQMIIVMGKHLGIPKPFPGPQIKGTCC  
LEKRICQLLEPLGFQCTFINDFDCYMTTEIGDFCACANVRRVFAFKWWWKMP----

>ENSDNOG00000016263/1-692

---LEGGAMVFDVICLSPDTPAHAVCMGTEICLDLSCAPQGCQSFTIVGSLGVLIVHYNTFPVKTKEV  
ATTRWPLSDHMDVLVMMVSPSTAPDGDVLSYQPDDEEDPMATAVLYLTGIEVSLDVIYRSGQVEMPSDP  
HAKKRWTVGSSGWGAILLVNCPANVGPQ-PDTDTTKVFSSEIKHLSQMTLSVQGPSCFLQKHRLVLTHTSK  
EESLKARVYWPQKDNPSVFEVLVLPQGHNYALPC----LENRLKETFYVEAMEFSPADFSGLISYSVSLVEE  
SQDLSIPEVLVYRDTVFRVAPCIVFPSTQMPLEVVYLCRELQVQGFVNTVMELSKKSNSQVASVYEDPNRLG  
RWLQDEMAFCYQAPHQTTSLVLDTPRVAKLEEFPMKYSLSPGTGYVTRRVEDCSAASMDSIGNLMSPPVK  
FQKDYPLGRILLGSSFYPSAEGRDMGTRLRDLFLYAQVQAPVELFSDWLTGHVDEFMCFVVDKSEGAK  
GFRLLASPSSCYDLFQEKQKEGYGDAPLFEVRAAQLLSNGREVKTIDQLLADDHLRQNDYVERCIRLNR  
DILRRELGLVEADIVHIPQLFCLPLANVPSSQQPGKSFARPYFPDMLRMIVMGKHLGIPKPFPGPQIKGACC  
LEEKVCHLLEPLGFQCTFINDFDCYLTVDVDFCACANVRRVFAFKWWWKMP----

>ENSLAFG00000010718/1-682

-----MSFQSIHLSDSPIQAICVLGTEICLDLHGCAPRECDSFTITGSLGVLTVNHNAVPIKTEEA  
ATTRWPLSGPMDVLVMMVSPSTAPSEDKVLVSYEPDKEVPVSIYVLYLTGIEISLDVIYRSGQVEMRSDK  
QAKKWWWGSSGWGAILLVNCPASVQQL-TDKKTK----PDIKLSQMTLSVQGPSCFLKHKHRLVLTHTSK  
EESLKARVYW-PQNSSSIFELVLVLPQGHYTLAP----LEDHLKTFYIEAMEFSPADFSGLISYSVSLVDE  
SQDPLIPEALVYKDTVFRVAPCIVFPSTQMPLEVIYLCRELQVQGFVNTVMELSKKSNSQVASVYEDPNRLG  
RWLQDEMAFCYQAPHKTIPLVLDTPRVTKIEDLPMKYSLSSDVGYIIQGIKDYRVASMDSIGNLMSPPVT  
VQKKEYPLGRILIGSSFYPSSEGRNMSKTLQDFLHAQQVQAPVELFSDWLMVGHIDEFMCFVPIRSEGEK  
GFRLLASPSSCYKLFEEKKGAGYGHMLLFEVVKVDQLLSNGREARTIDQLLADENMRNNDYVEKCIHLNR  
DILKRELGLVEKDIIDIPQLFCLQLTHISSNQTEKRFARPYFPNMLQMIIVMGKHLGIPKPFPGPHIKGNCC  
LEEKVCHLLEPLGFQCTFINDFDCYLTVDVDFCACANVRRVFAFKWWWKMP----
